# Supplementary material for: A substituent- and temperature-controllable NHC-derived zwitterionic catalyst enables CO2 upgrading for high-efficiency construction of formamides and benzimidazoles
Source: Royal Society of Chemistry journal article supplement (doi:10.1039/d1gc01897c), 2021-01-01
Supplement: d1gc01897c1.pdf [file d1gc01897c1.pdf]

## Supporting Information

### **Substituent- and temperature-controllable NHC-derived zwitterionic catalyst enables CO<sub>2</sub> upgrading for high-efficiency construction of formamides and benzimidazoles**

Zhaozhuo Yu, Zhengyi Li, Lilong Zhang, Kaixun Zhu, Hongguo Wu, Hu Li\*, Song Yang\*

*State Key Laboratory Breeding Base of Green Pesticide & Agricultural Bioengineering, Key Laboratory of Green Pesticide & Agricultural Bioengineering, Ministry of Education, State-Local Joint Laboratory for Comprehensive Utilization of Biomass, Center for R&D of Fine Chemicals, Guizhou University, Guiyang, Guizhou 550025, China.*

\* Corresponding authors.

E-mails: hli13@gzu.edu.cn (HL); jhzx.msm@gmail.com (SY)

## Experimental details

### The synthesis of Catalysts

The catalysts **1a-1f** were synthesized as follows: The mixture of the corresponding precursor, 4.5 mL dimethyl carbonate, and 10 mL methanol were placed into the Teflon-lined, stainless steel autoclave and then was heated to 110-140 °C for 26-48 h. The detailed information about the synthesis of **1a-1f** is shown in Table S1.

**Table S1.** The particular information about the synthesis of catalysts **1a-1f**

| Entry | Catalyst  | Precursor                  | M <sub>pre</sub> <sup>a</sup> | Time (h) | Temp. (°C) |
|-------|-----------|----------------------------|-------------------------------|----------|------------|
| 1     | <b>1a</b> | 1-Methylimidazole          | 1.98 g                        | 36       | 110        |
| 2     | <b>1b</b> | 1-Methylbenzimidazole      | 3.30 g                        | 48       | 140        |
| 3     | <b>1c</b> | 1-Propylimidazole          | 2.66 g                        | 36       | 110        |
| 4     | <b>1d</b> | 1,4-Dimethylimidazole      | 2.32 g                        | 36       | 110        |
| 5     | <b>1e</b> | 1-Acetylimidazole          | 2.75 g                        | 48       | 140        |
| 6     | <b>1f</b> | 5-Chloro-1-methylimidazole | 2.91 g                        | 48       | 140        |

<sup>a</sup> The weight of the corresponding precursor.

### The purification of catalysts

First, the solvent was removed from the resulting reaction mixture by reduced-pressure distillation. Then, for catalyst **1c**, the obtained liquid was washed with acetone six times (6×15 mL) and ether two times (2×10 mL). For the catalysts **1a**, **1b**, **1e**, **1d**, and **1f**, the obtained solids were washed with dichloromethane (15 mL) three times, acetone (15 mL) three times, and ether (10 mL) two times respectively. Finally, all imidazolium-CO<sub>2</sub> adducts were dried under vacuum at room temperature.

### A typical procedure for the imidazolium-CO<sub>2</sub> adducts catalyzed the construction of C-N bond for the synthesis of formamide derivatives and benzimidazole-based compounds from benzylamine and *o*-phenylenediamine

The model procedure is detailed for the transformation of amine to formamide or

benzylamine using imidazolium-CO<sub>2</sub> adduct as catalyst (5 mol%) and phenylsilane (0.42 mmol for *N*-formylation, 1 mmol for cyclization) as silane. A 25 mL reaction tube equipped with a magnetic stir bar and 2 mm glass stopcock was charged with imidazolium-CO<sub>2</sub> adduct at first. Then, the reaction tube was degassed and exposed to carbon dioxide (pressure = 1 bar) and a reaction mixture including 2 mL CH<sub>3</sub>CN (or dimethylformamide in cyclization reaction), amine (0.25 mmol), and phenylsilane was injected into the reaction tube. The flask was connected with a CO<sub>2</sub> balloon and stirred for 24 h.

#### **The dissolution test of imidazolium-CO<sub>2</sub> adducts**

A 25 mL reaction tube was charged with CH<sub>3</sub>CN (2 mL), imidazolium-CO<sub>2</sub> (40 mg). Then, the mixture was degassed and exposed to N<sub>2</sub> (pressure=1 bar). The mixture was stood at room temperature for 24 h. Ensuring the stable existence of imidazolium-CO<sub>2</sub> adducts in CH<sub>3</sub>CN, the reaction tube was heated to 80 °C for 50 min. Then, until the reaction tube was cooled to room temperature, the reaction mixture was stirred for 24 h under N<sub>2</sub> (or CO<sub>2</sub>). Finally, the residual was filtered out through a high-speed centrifuge (10000 rpm, 5 min) and weighed.

#### **The recycling of catalysts and purification of production**

The investigation of the catalytic activity for the recycled catalyst was processed as the typical procedure and the reaction condition was optimized (25 °C, 24 h, 5 mol% catalyst, 0.25 mmol amine). After the completion of the *N*-formylation reaction, the solid siloxane was removed from the reaction mixture by a high-speed centrifuge (10000 rpm, 5 min). Then, the solvent CH<sub>3</sub>CN was removed by reduced pressure distillation. The residual was added to diethyl ether (5 mL). Until the residual cannot dissolve into the ether continually, the solid in the solution was filtered out by a high-speed centrifuge (10000 rpm, 5 min) and dried in a vacuum for 24 h, which is the recycled imidazolium-CO<sub>2</sub>. The ether in the residual liquid was removed by a high-speed centrifuge (10000 rpm, 5 min) and the residual solid was the purified product.

### The in-situ FTIR analysis for NHC-CO<sub>2</sub>

The in-situ FTIR spectra were carried out using a Thermo Fisher Nicolet iS5 FT-IR spectrometer. The temperature was controlled with a thermocouple. The background spectra were recorded at first. Then, NHC-CO<sub>2</sub> was loaded into the in-situ FTIR cell and flushed with N<sub>2</sub> (100 mL min<sup>-1</sup>) for 30 min and the temperature of the system was raised at a rate of 1 °C min<sup>-1</sup> from 25 °C to 80 °C. The process was repeated twice under the same conditions. The spectra were recorded every minute.

### The analysis of the sample

The concentrations of the product obtained from the *N*-formylation and cyclization reaction were determined by using a GC instrument equipped with an HP-5 chromatographic column (30 m × 0.320 mm × 0.25 μm) and an FID, using naphthalene as an internal standard referring to the standard curves (R<sup>2</sup> >0.999) obtained with commercial specimens. The formula for calculating the yield and conversion are as follows:

$$\text{Conversion (\%)} = \left(1 - \frac{\text{mole of residual substrate}}{\text{mole of initial substrate}}\right) \times 100\%$$

$$\text{Yield (\%)} = \frac{\text{mole of product}}{\text{mole of initial substrate}} \times 100\%$$

### Computational details

All optimized structure and energy calculations were performed with density functional theory (DFT) using the M06-2x functional implemented in the Gaussian 09 Revision D.01 software at ambient pressure (1 atm) and room temperature. The 6-311G(d,p) all-electron basis was set for main group elements in this study.

**Table S2.** Computational data for chemical property assessment of catalysts **1a-1f**

| Catalyst | P <sub>O</sub> <sup>a</sup> | P <sub>C</sub> <sup>b</sup> | L <sub>C-C</sub> <sup>c</sup> |
|----------|-----------------------------|-----------------------------|-------------------------------|
|----------|-----------------------------|-----------------------------|-------------------------------|

|                    |        |       |       |
|--------------------|--------|-------|-------|
| Catalyst <b>1a</b> | -0.709 | 0.096 | 1.588 |
| Catalyst <b>1b</b> | -0.703 | 0.097 | 1.623 |
| Catalyst <b>1c</b> | -0.705 | 0.094 | 1.589 |
| Catalyst <b>1d</b> | -0.704 | 0.094 | 1.602 |
| Catalyst <b>1e</b> | -0.677 | 0.123 | 1.579 |
| Catalyst <b>1f</b> | -0.709 | 0.111 | 1.588 |

<sup>a</sup> The charge population of oxygen atom in the carboxyl groups of catalysts **1a-1f**

<sup>b</sup> The charge population of carbon atom between two nitrogen atoms in the NHC, which is separated from catalysts **1a-1f**

<sup>c</sup> The bond Length of C-C bond that connects with the carboxyl and imidazole group.

**Table S3.** The dissolution and precipitation of catalysts in CH<sub>3</sub>CN.

| Entry | Catalyst           | Residue mass ratio <sup>a</sup> |                              |
|-------|--------------------|---------------------------------|------------------------------|
|       |                    | N <sub>2</sub> <sup>b</sup>     | CO <sub>2</sub> <sup>c</sup> |
| 1     | Catalyst <b>1a</b> | 36.92%                          | 83.72%                       |
| 2     | Catalyst <b>1b</b> | 95.87%                          | 96.69%                       |
| 3     | Catalyst <b>1d</b> | 92.06%                          | 96.47%                       |
| 4     | Catalyst <b>1e</b> | 0%                              | 10.36%                       |
| 5     | Catalyst <b>1f</b> | 0%                              | 0%                           |

<sup>a</sup> The mass proportion of precipitate on the total catalyst.

<sup>b</sup> The precipitate produced under N<sub>2</sub> condition (1 atm) at room temperature for 48 h.

<sup>c</sup> The precipitate produced under CO<sub>2</sub> condition (1 atm) at room temperature for 48 h.

## Characterization

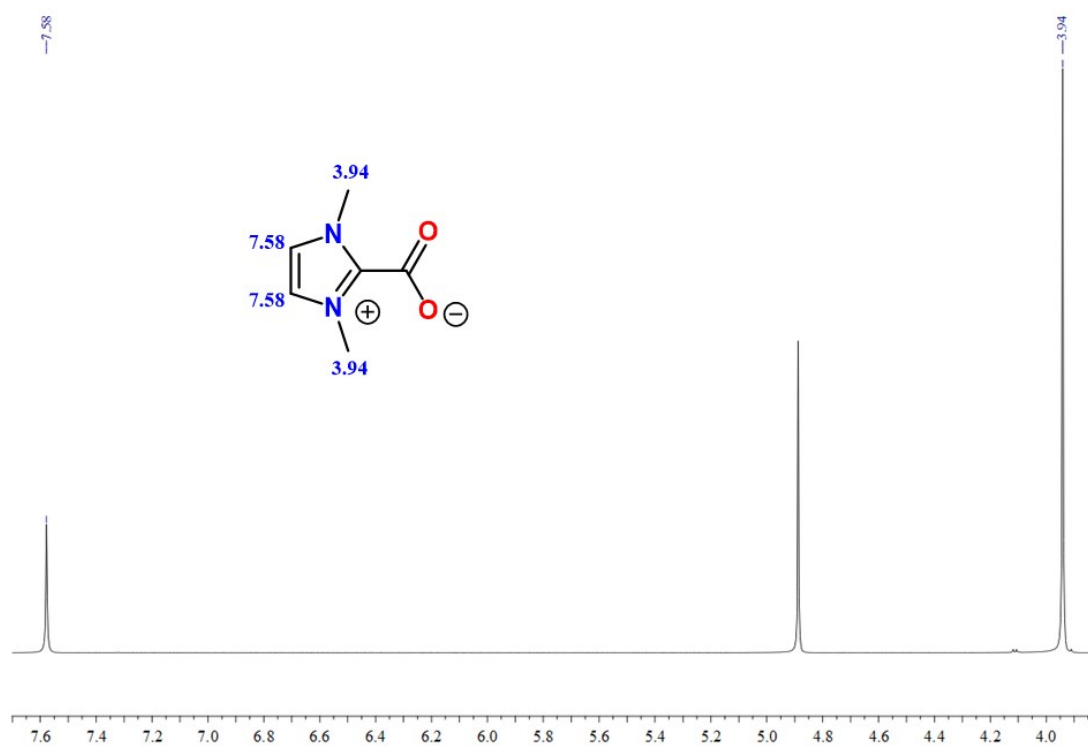

**Figure S1.** The <sup>1</sup>H NMR spectrum (in CD<sub>3</sub>OD) of 1,3-dimethylbenzimidazolium-2-carboxylate (**1a**).

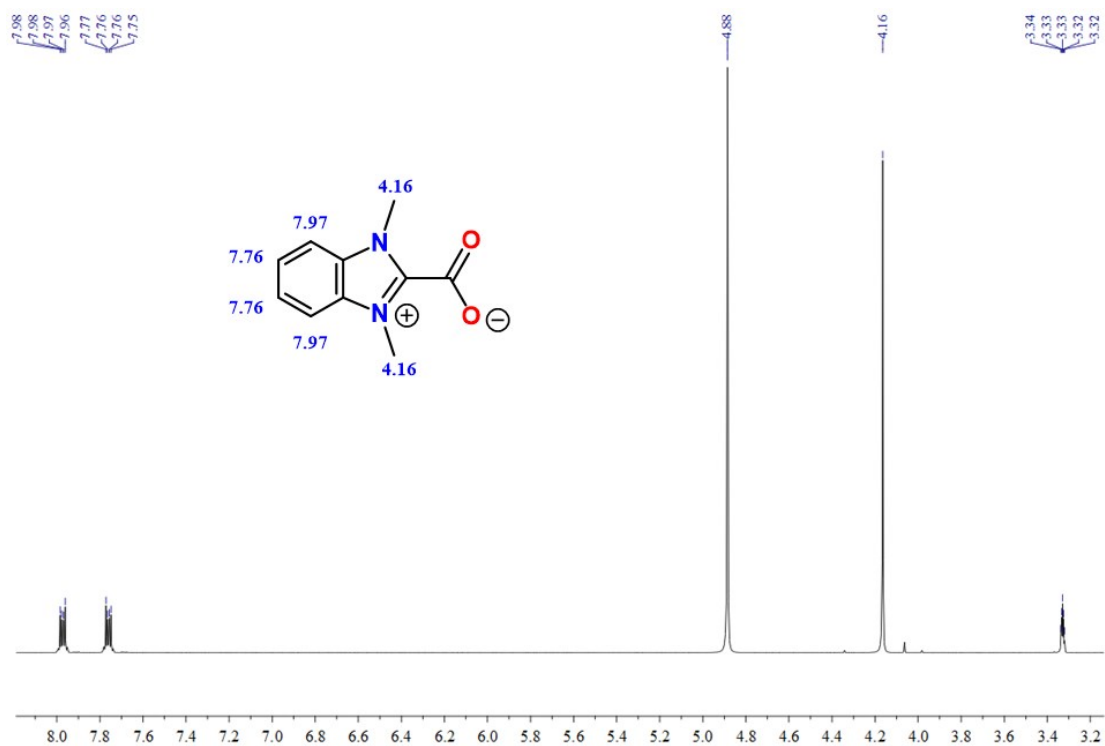

**Figure S2.** The <sup>1</sup>H NMR spectrum (in CD<sub>3</sub>OD) of 1,3-dimethylbenzimidazolium-2-carboxylate (**1b**).

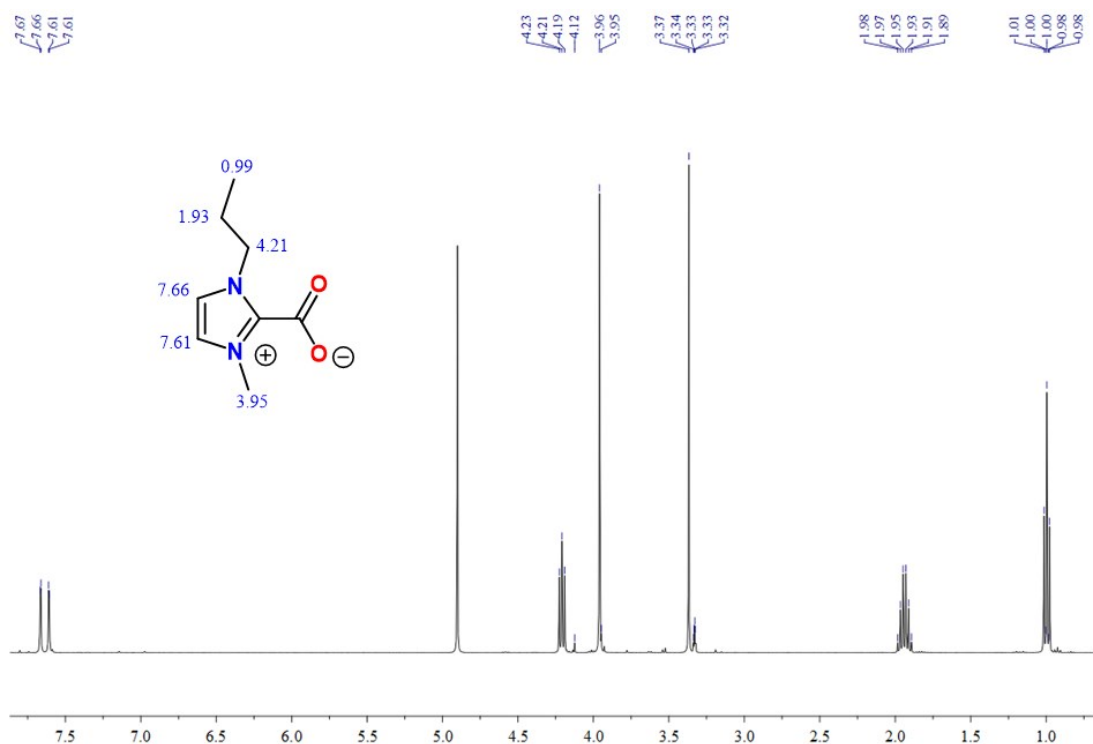

**Figure S3.** The  $^1\text{H}$  NMR spectrum (in  $\text{CD}_3\text{OD}$ ) of 1-propyl-3-methylimidazolium-2-carboxylate (**1c**).

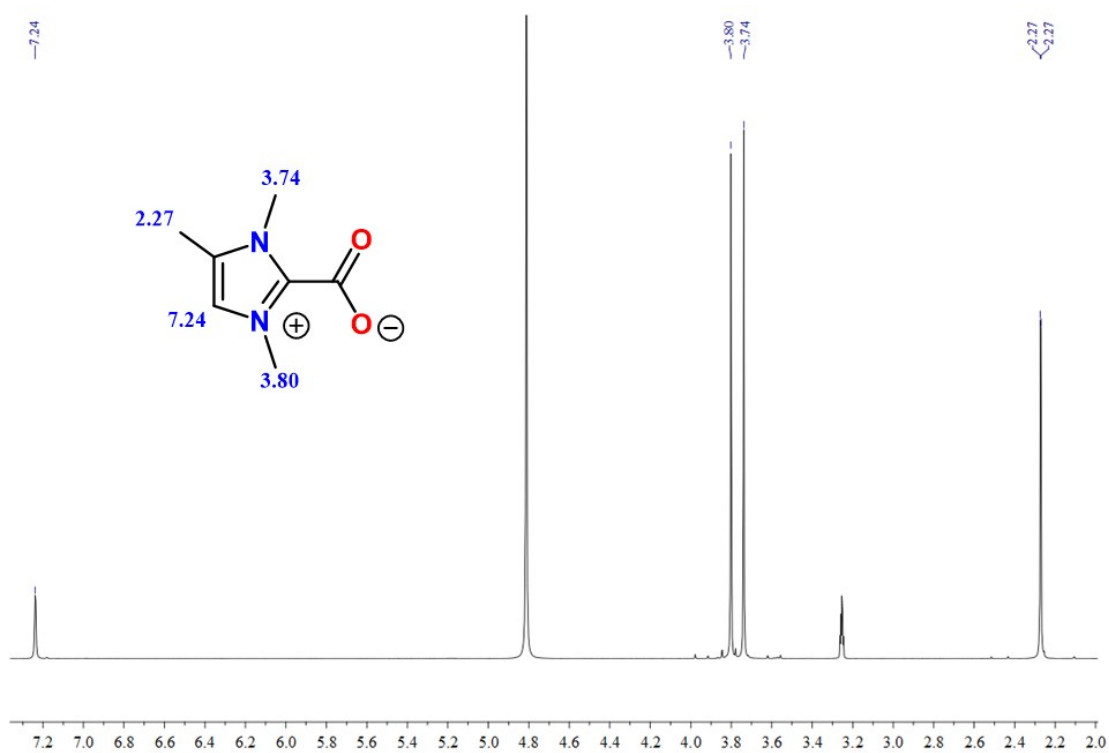

**Figure S4.** The  $^1\text{H}$  NMR spectrum (in  $\text{CD}_3\text{OD}$ ) of 1,3,4-trimethylbenzimidazolium-2-carboxylate (**1d**).

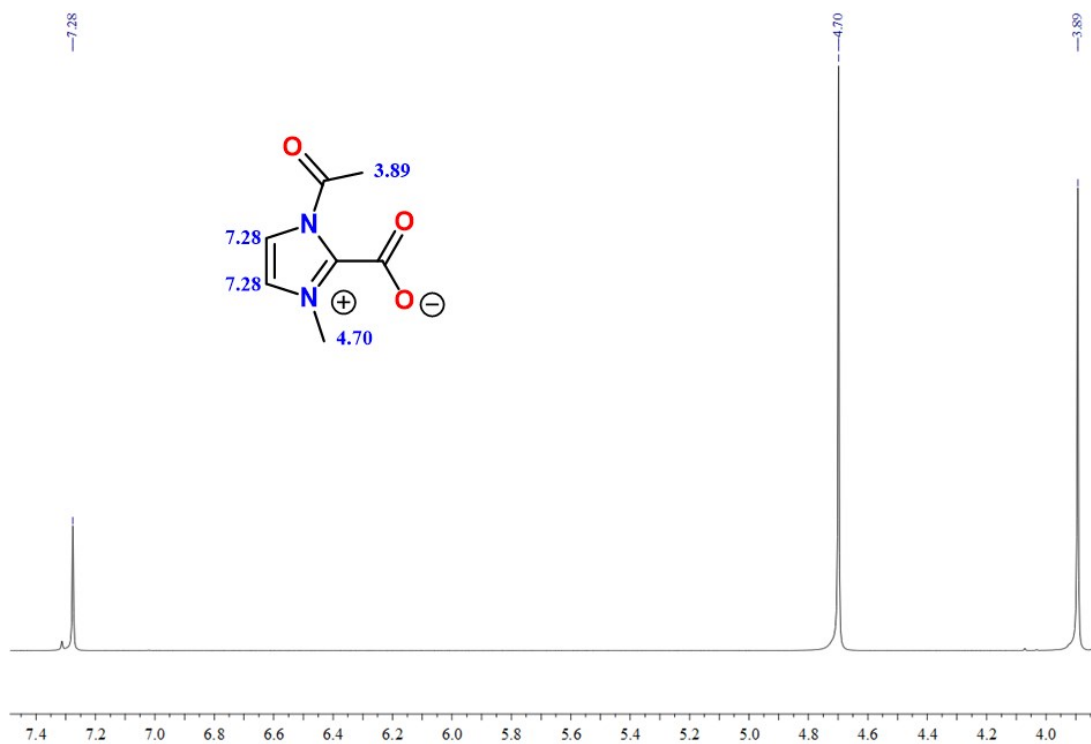

**Figure S5.** The  $^1\text{H}$  NMR spectrum (in  $\text{D}_2\text{O}$ ) of 1-acetyl-3-methylimidazolium-2-carboxylate (**1e**).

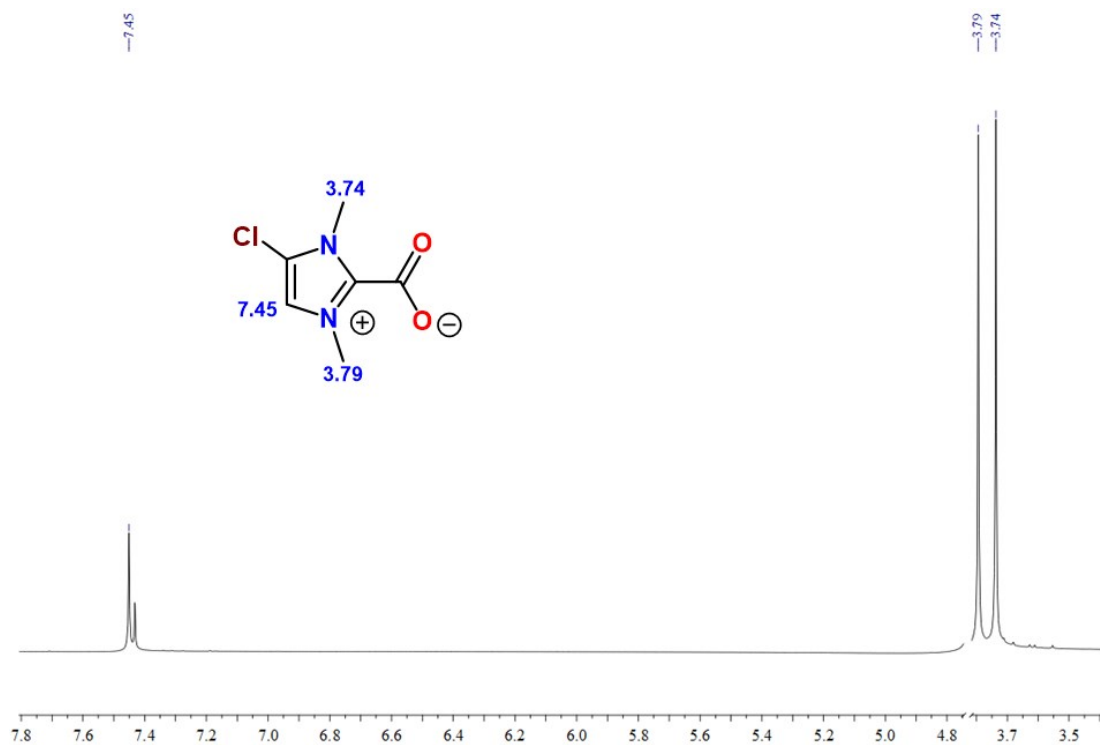

**Figure S6.** The  $^1\text{H}$  NMR spectrum (in  $\text{D}_2\text{O}$ ) of 5-chloro-1,3-dimethylimidazolium-2-carboxylate (**1f**).



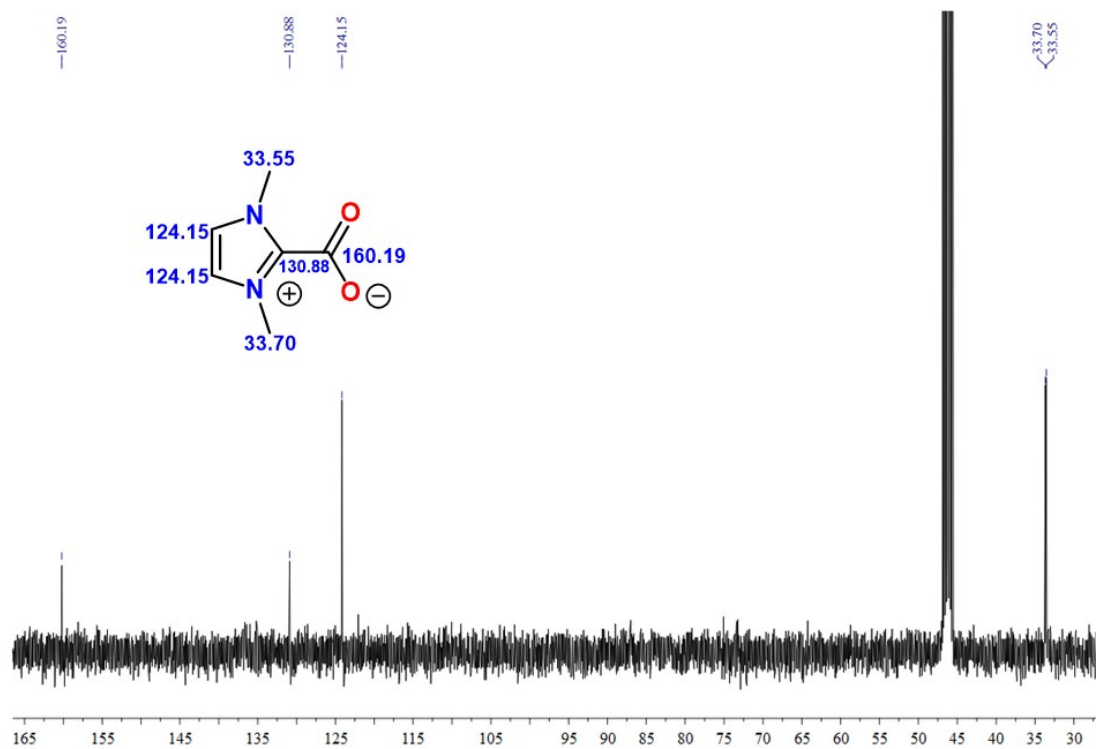

**Figure S7.** The  $^{13}\text{C}$  NMR spectrum (in  $\text{CD}_3\text{OD}$ ) of 1,3-dimethylbenzimidazolium-2-carboxylate (**1a**).

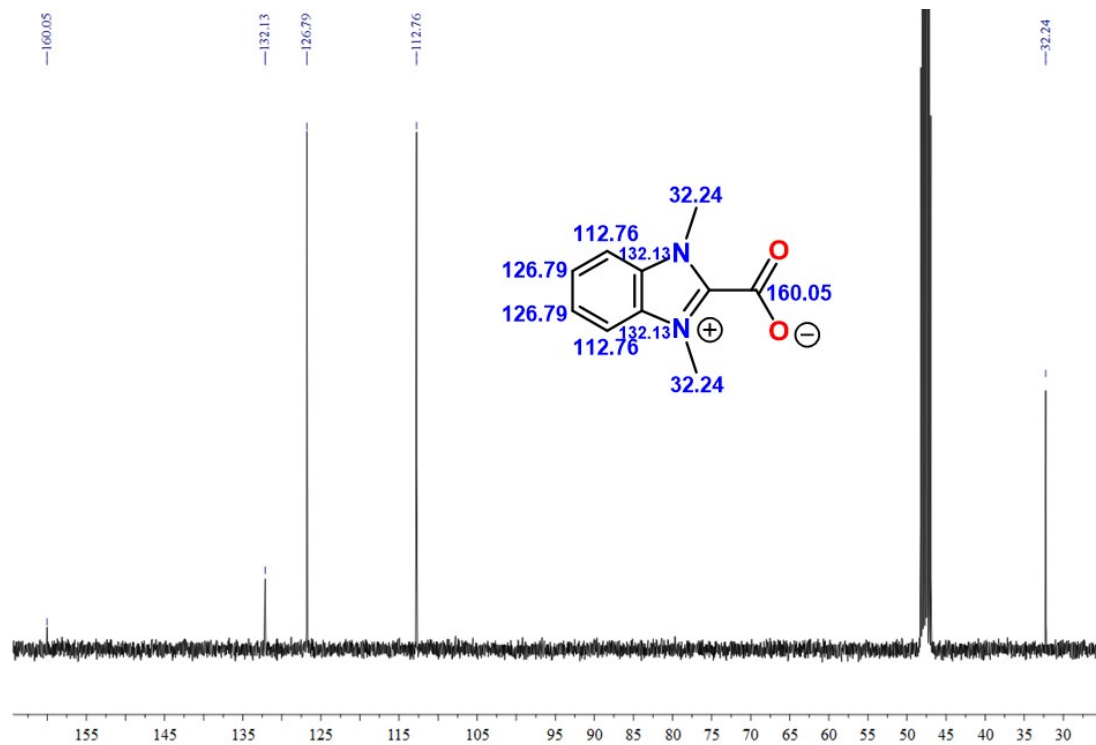

**Figure S8.** The  $^{13}\text{C}$  NMR spectrum (in  $\text{CD}_3\text{OD}$ ) of 1,3-dimethylbenzimidazolium-2-carboxylate (**1b**).

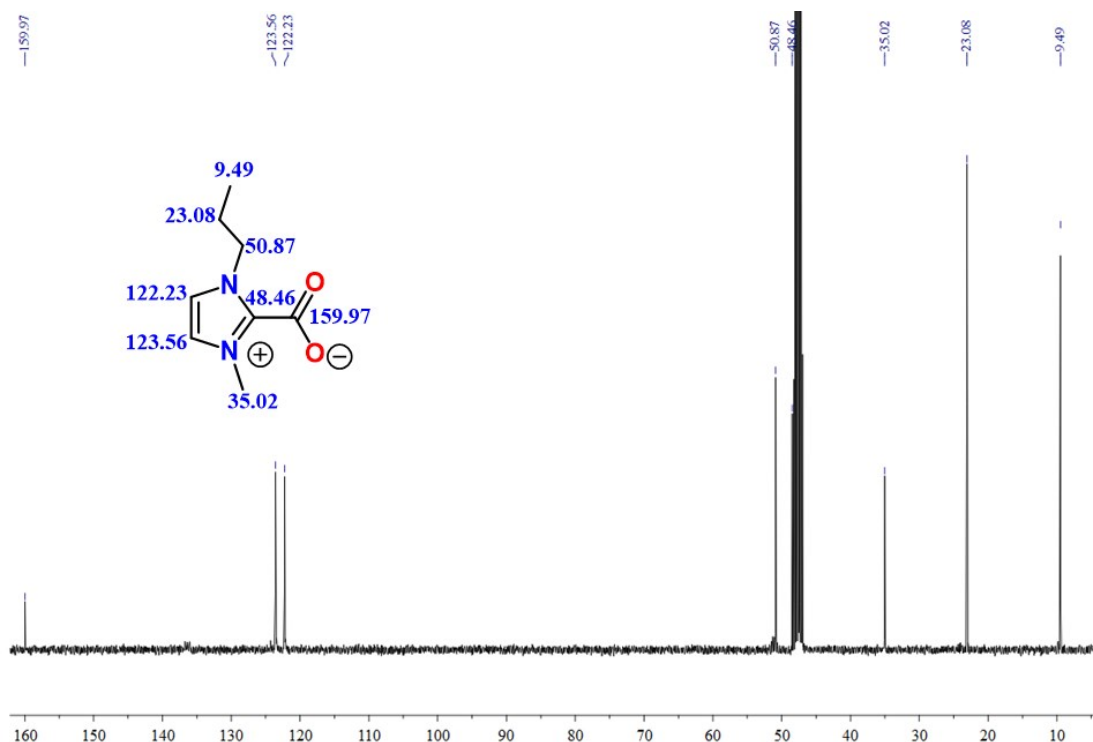

**Figure S9.** The <sup>13</sup>C NMR spectrum (in CD<sub>3</sub>OD) of 1-propyl-3-methylimidazolium-2-carboxylate (**1c**).

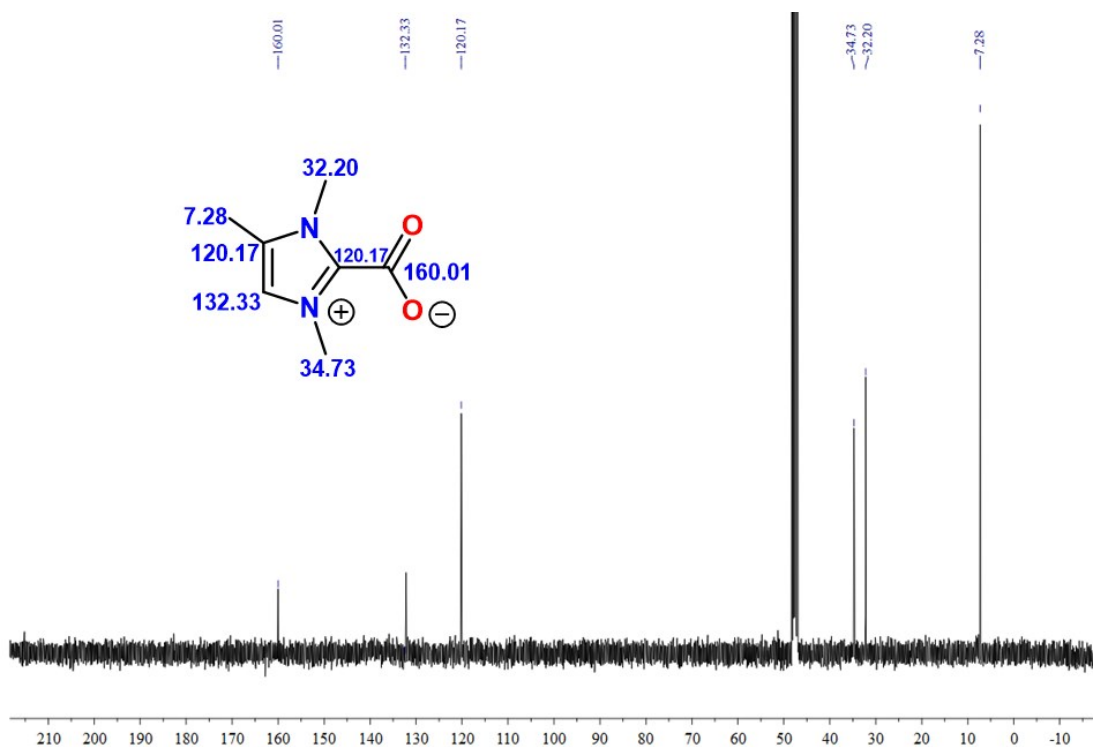

**Figure S10.** The <sup>13</sup>C NMR spectrum (in CD<sub>3</sub>OD) of 1,3,4-trimethylbenzimidazolium-2-carboxylate (**1d**).

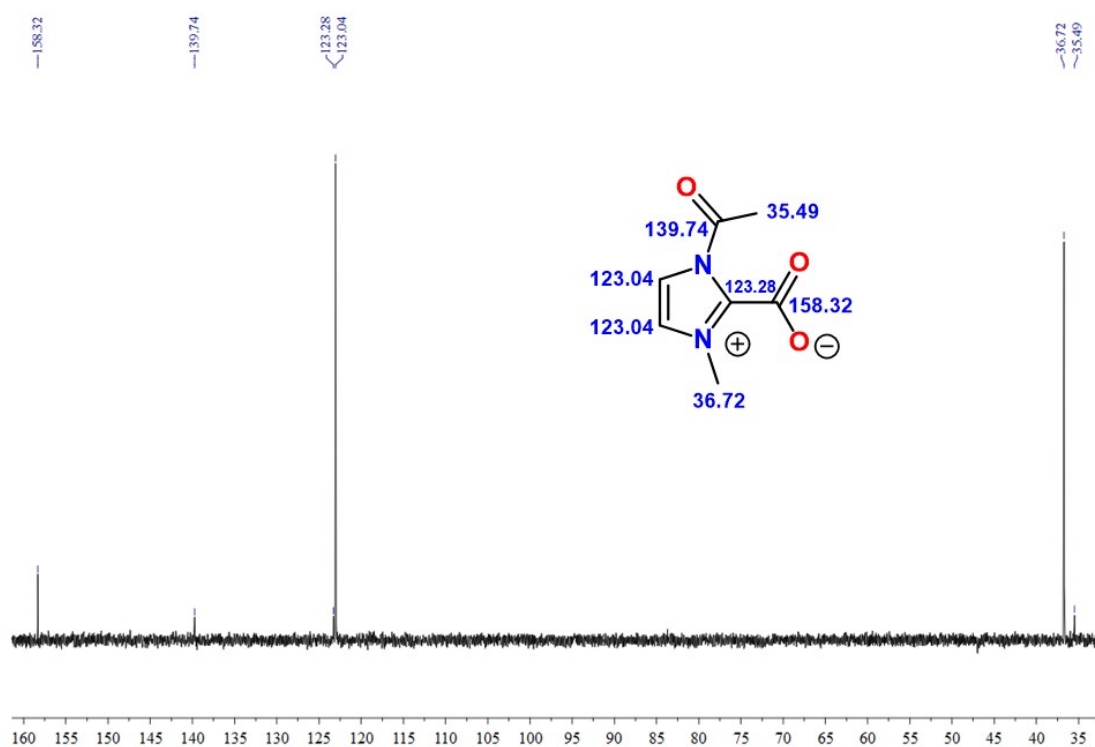

**Figure S11.** The  $^{13}\text{C}$  NMR spectrum (in  $\text{D}_2\text{O}$ ) of 1-acetyl-3-methylimidazolium-2-carboxylate (**1e**).

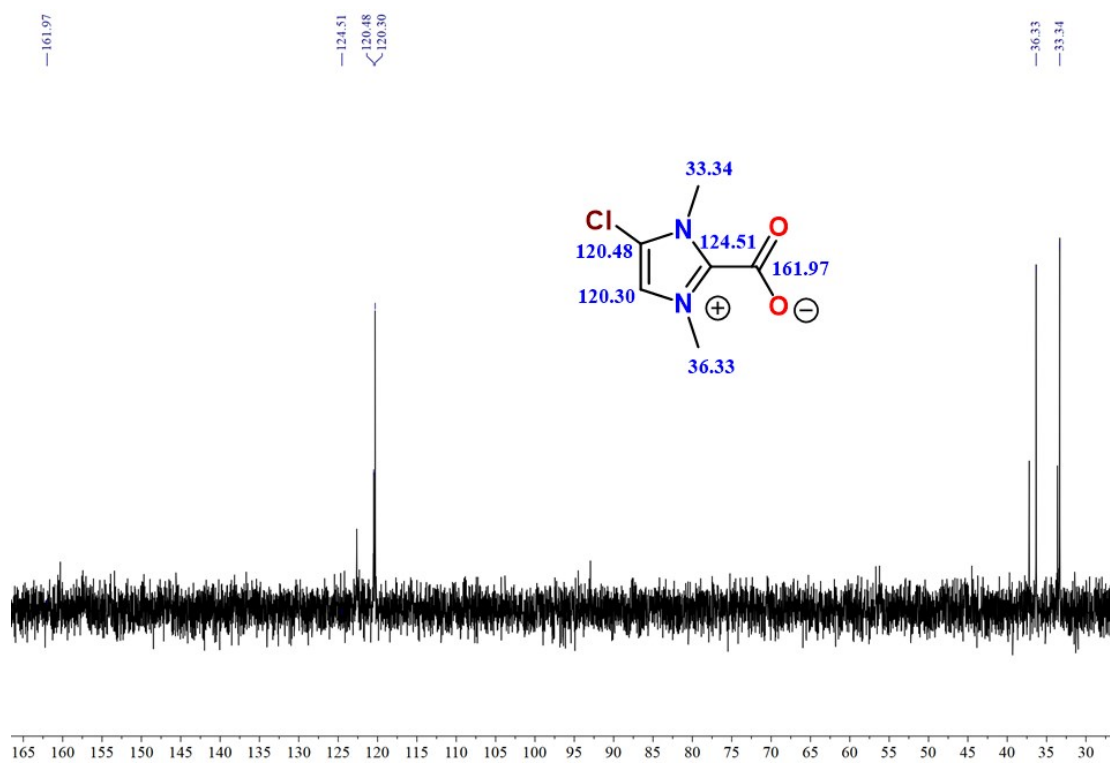

**Figure S12.** The  $^{13}\text{C}$  NMR spectrum (in  $\text{D}_2\text{O}$ ) of 5-chloro-1,3-dimethylimidazolium-2-carboxylate (**1f**).

2020071136 #22 RT: 0.21 AV: 1 NL: 1.65E4  
T: FTMS - p ESI Full ms [100.0000-1000.0000]

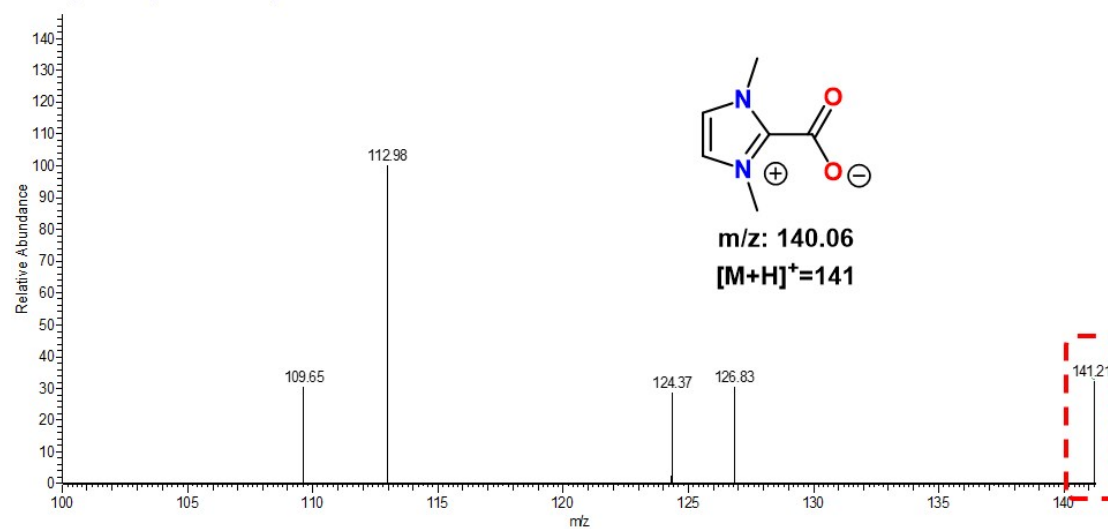

**Figure S13.** The mass spectrum of 1,3-dimethylbenzimidazolium-2-carboxylate (1a).

2020071134 #39 RT: 0.37 AV: 1 NL: 1.08E9  
T: FTMS + p ESI Full ms [100.0000-1000.0000]

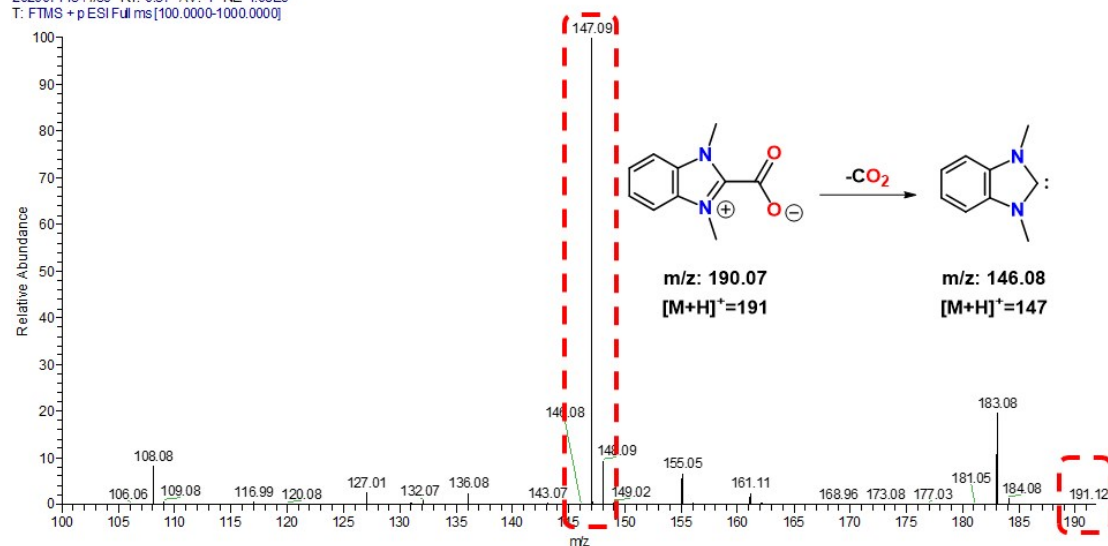

**Figure S14.** The mass spectrum of 1,3-dimethylbenzimidazolium-2-carboxylate (1b).

2020071131#356 RT: 3.49 AV: 1 NL: 2.39E4  
T: FTMS - p ESI Full ms [100.0000-1000.0000]

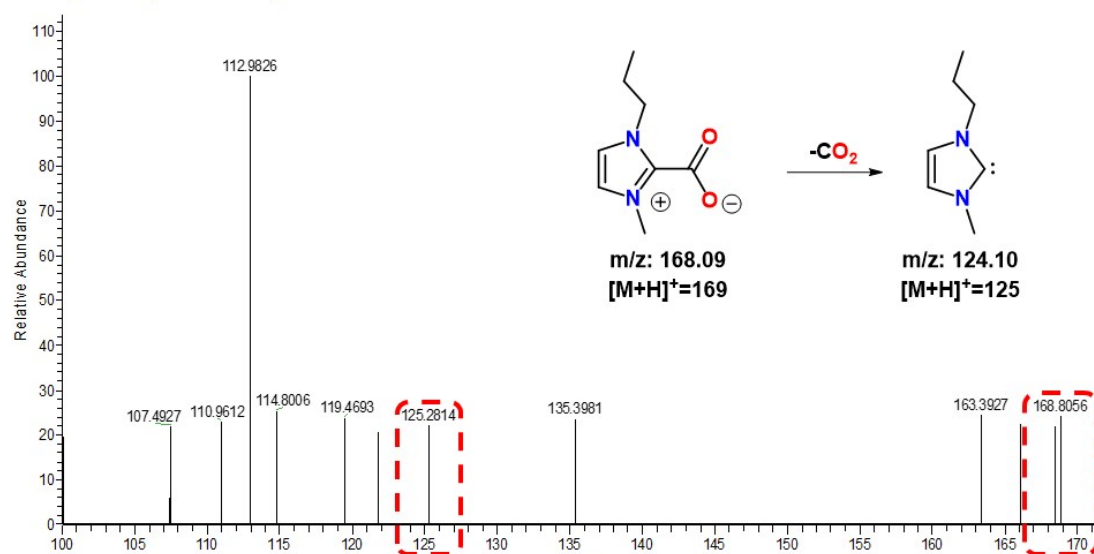

**Figure S15.** The mass spectrum of 1-propyl-3-methylimidazolium-2-carboxylate (**1c**).

202007113E #31 RT: 0.30 AV: 1 NL: 2.90E8  
T: FTMS + p ESI Full ms [100.0000-1000.0000]

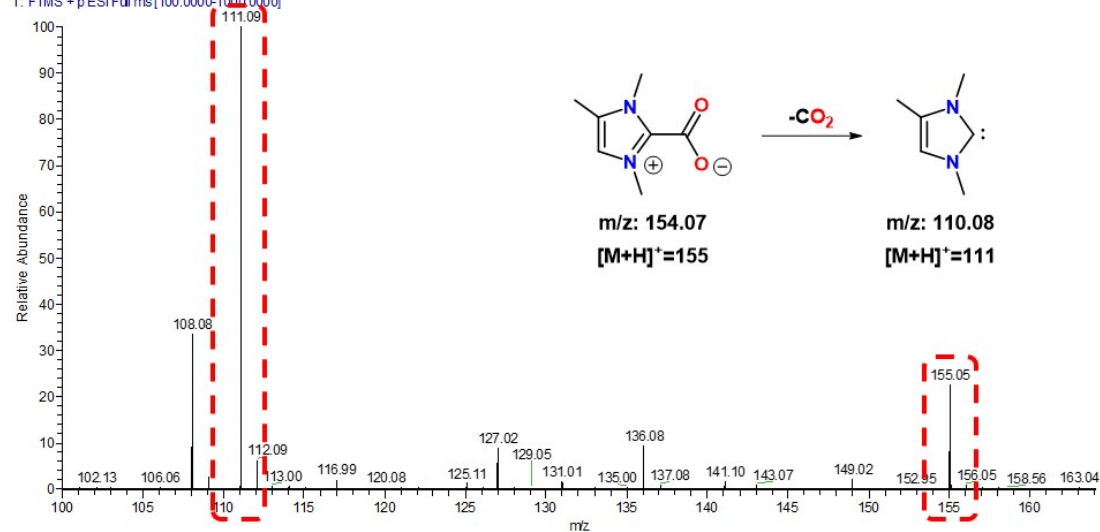

**Figure S16.** The mass spectrum of 1,3,4-trimethylbenzimidazolium-2-carboxylate (**1d**).

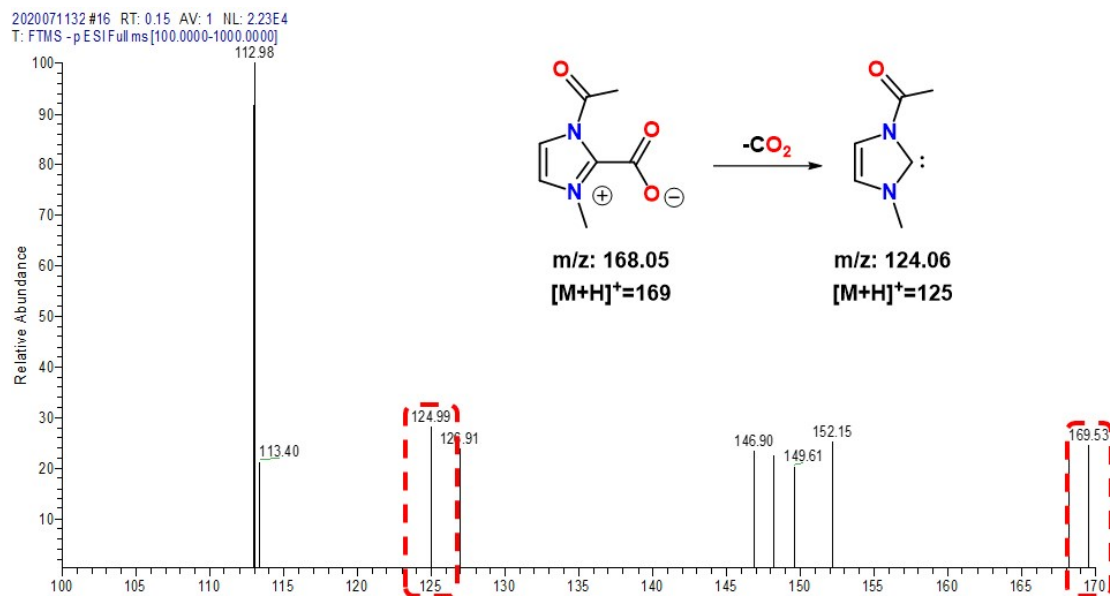

**Figure S17.** The mass spectrum of 1-acetyl-3-methylimidazolium-2-carboxylate (**1e**).

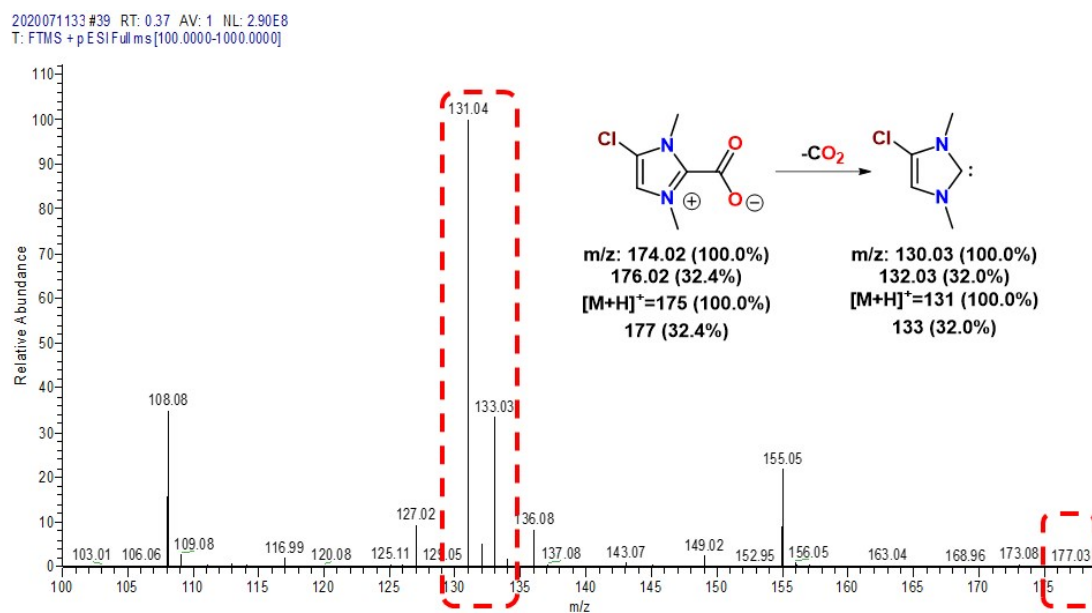

**Figure S18.** The mass spectrum of 5-chloro-1,3-dimethylimidazolium-2-carboxylate (**1f**).

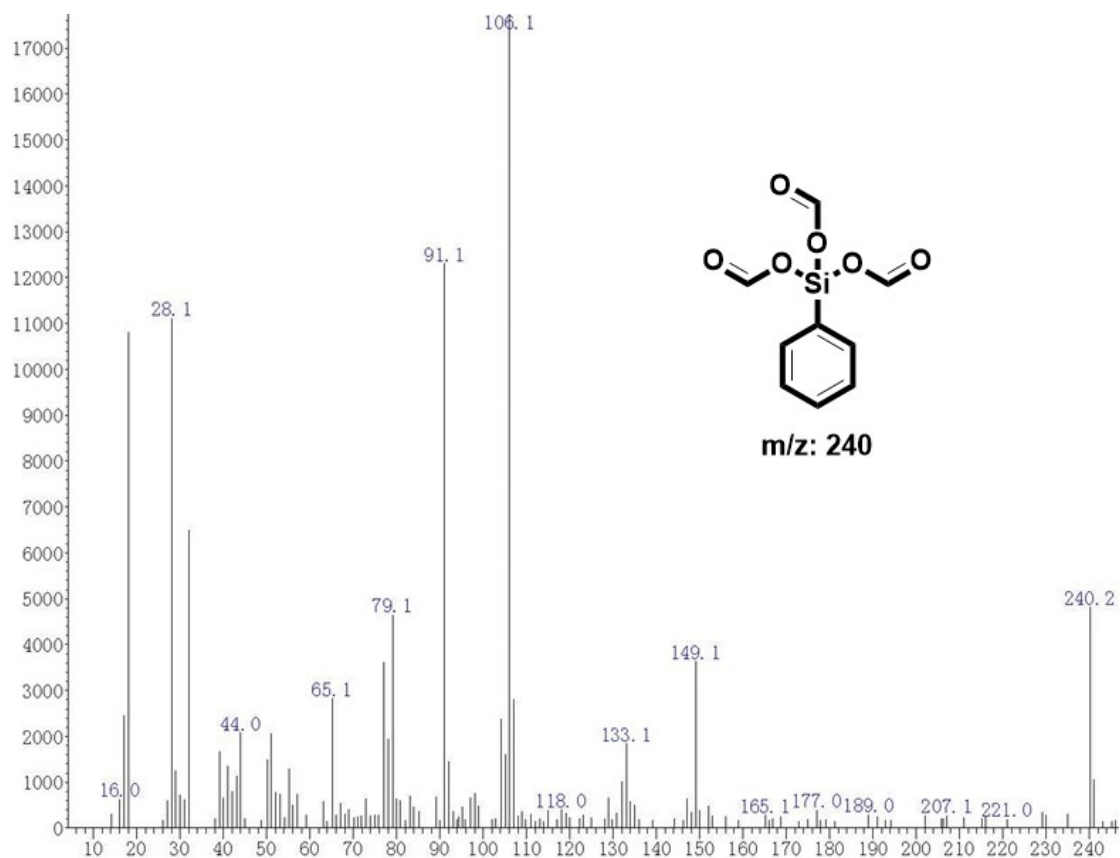

**Figure S19.** The mass spectrum of phenylsilanetriyl triformate.

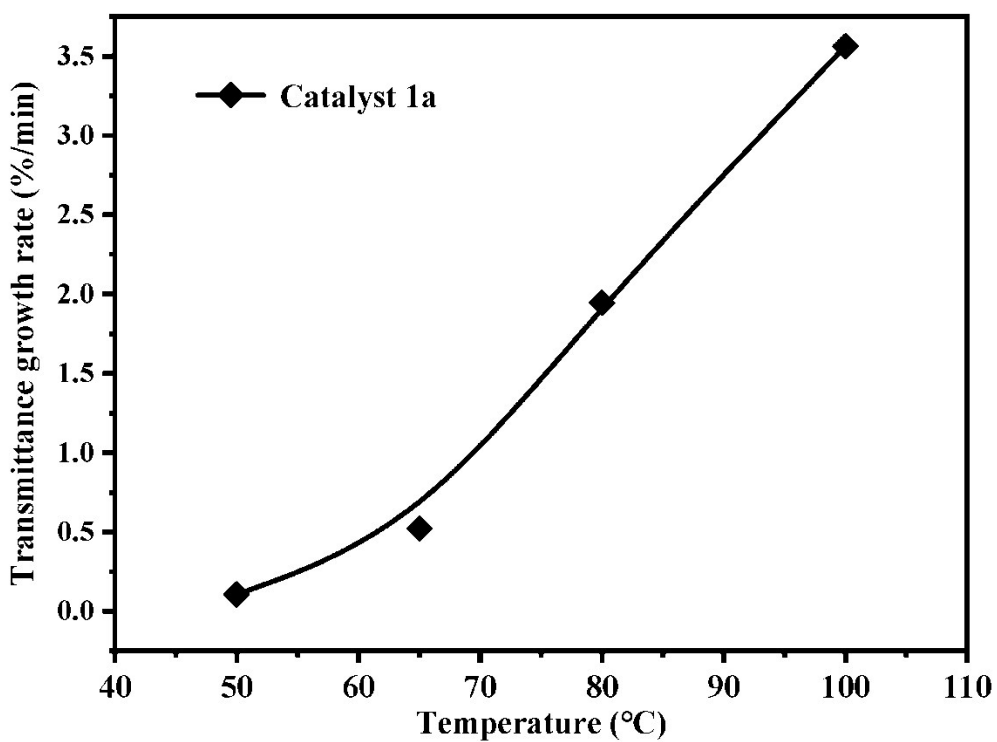

**Figure S20.** Plots of maximum transmittance growth rate at 1715 cm<sup>-1</sup> for the decomposition of **1a** at varying temperature.

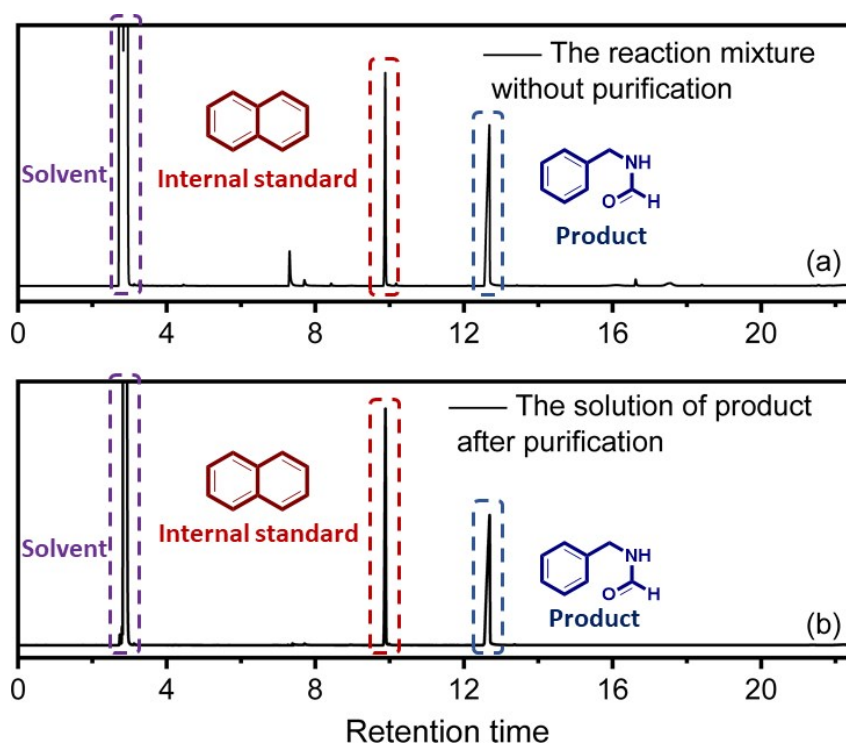

**Figure S21.** The gas chromatography graphs of reaction mixture (a) before and (b) after purification.

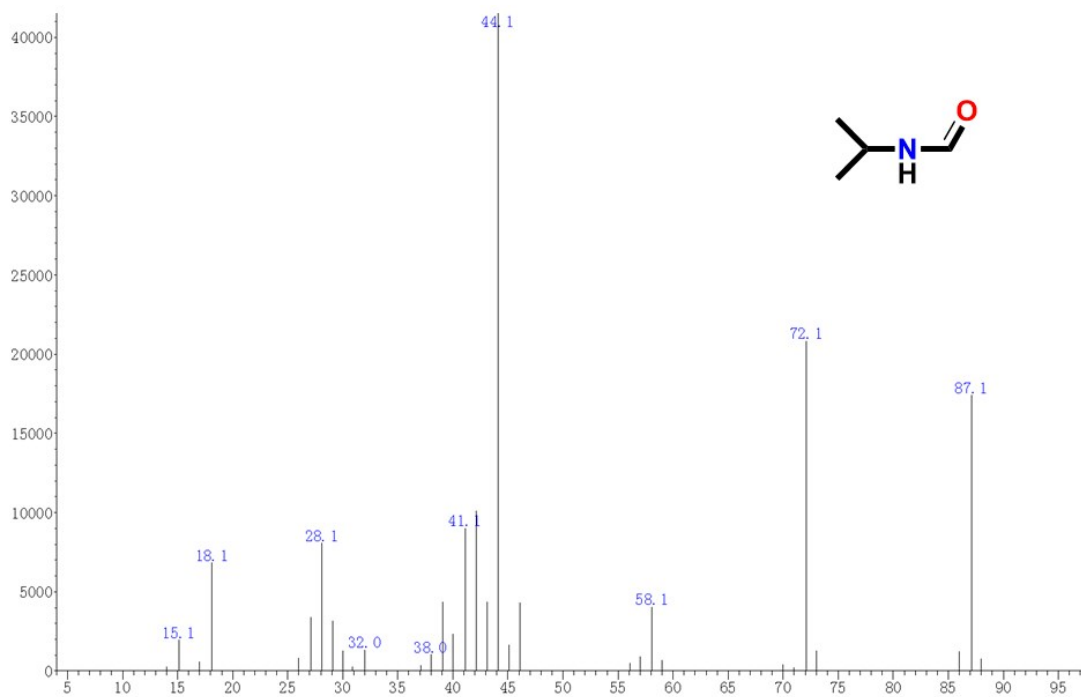

**Figure S22.** The mass spectrum of **3a**.



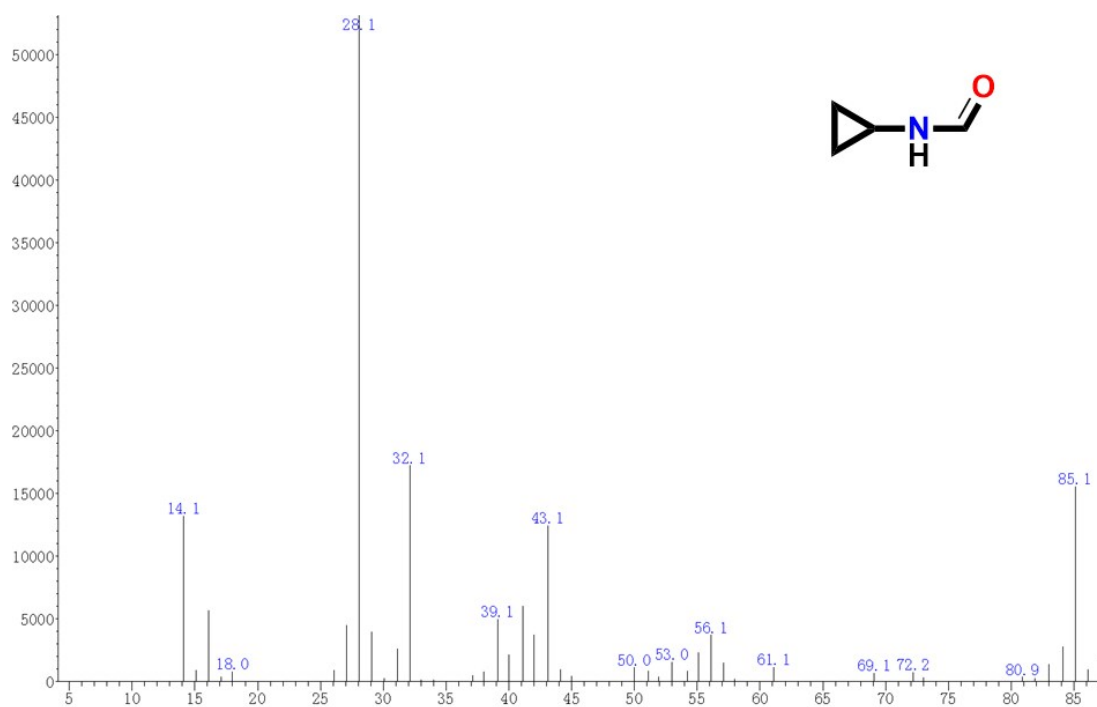

Figure S23. The mass spectrum of 3b.

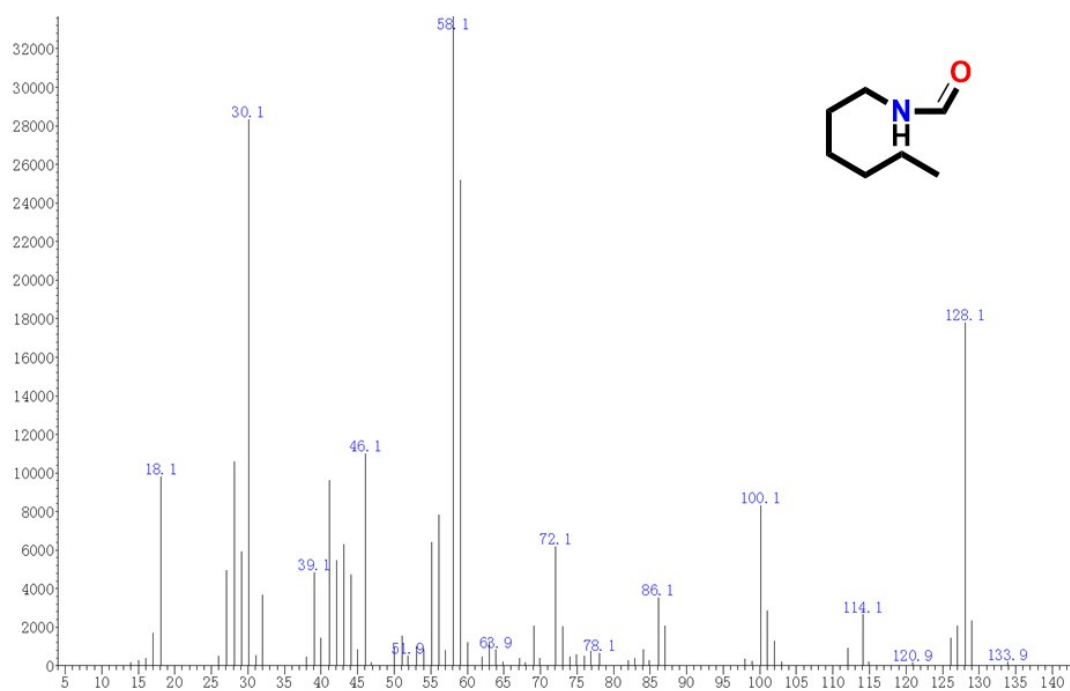

Figure S24. The mass spectrum of 3c.

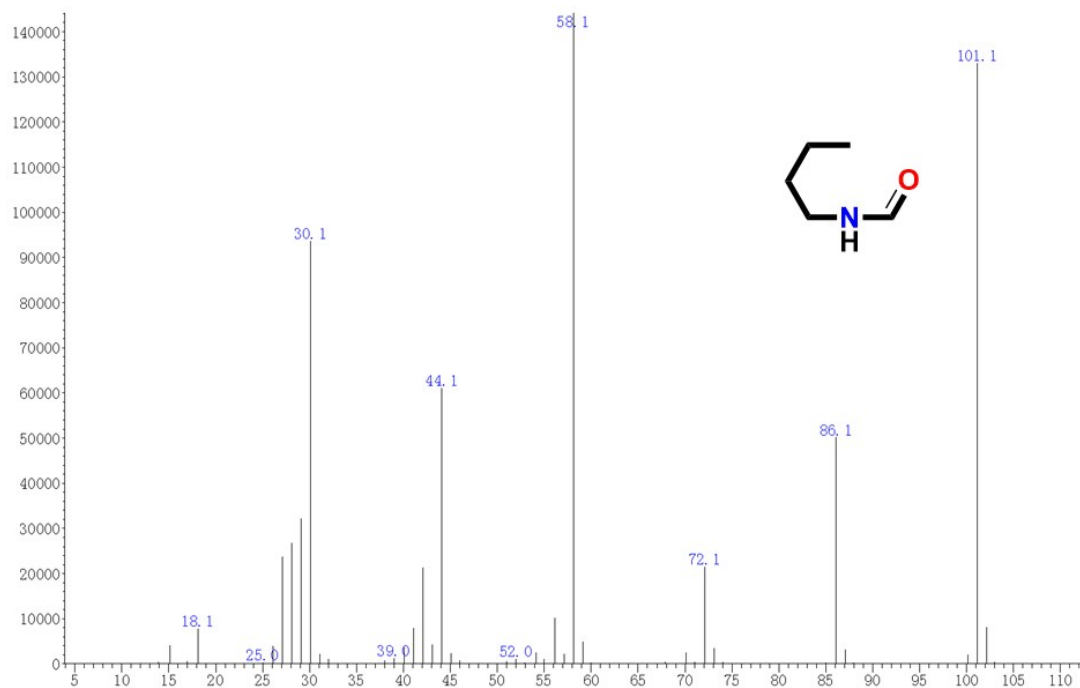

Figure S25. The mass spectrum of 3d.

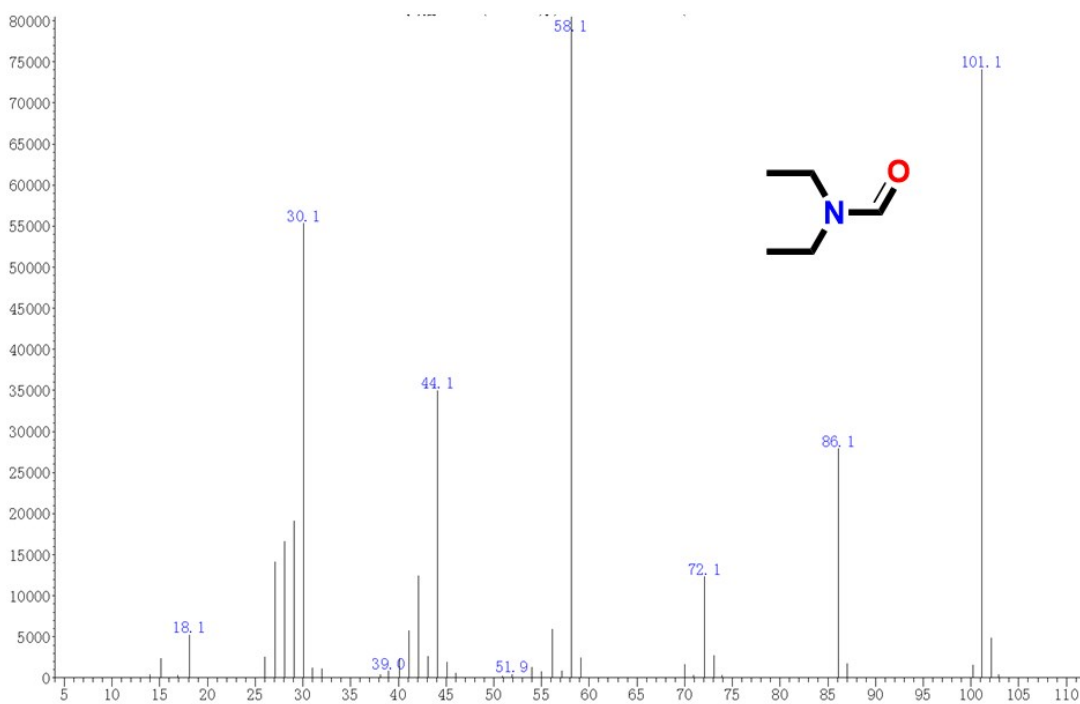

Figure S26. The mass spectrum of 3e.

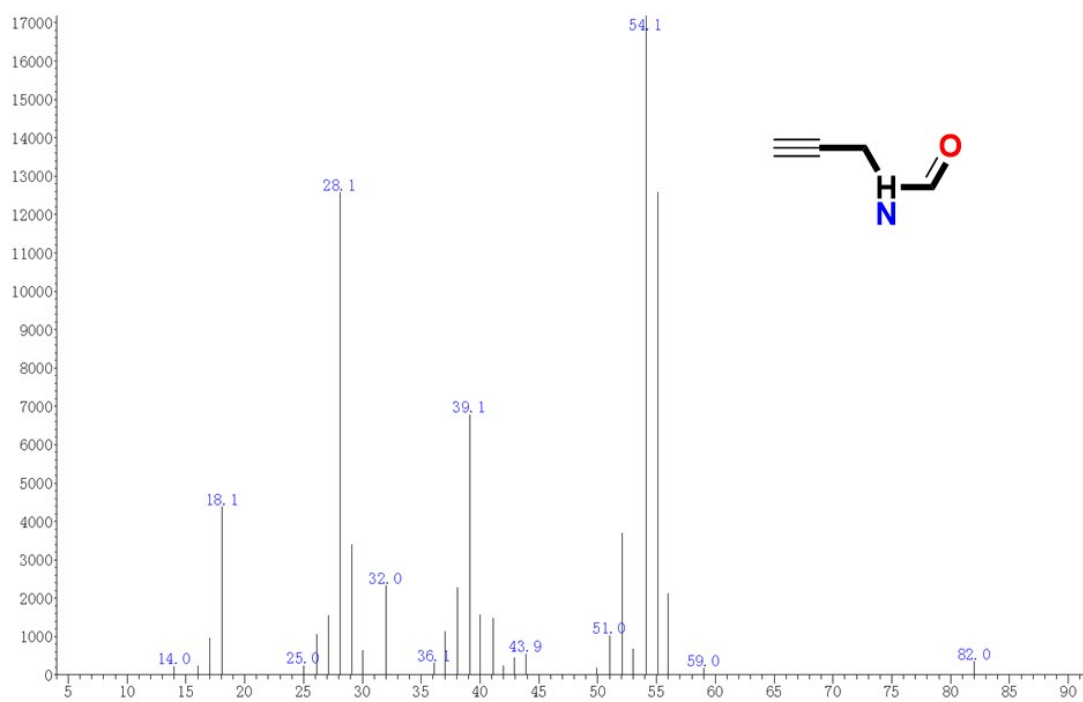

**Figure S27.** The mass spectrum of **3f**.

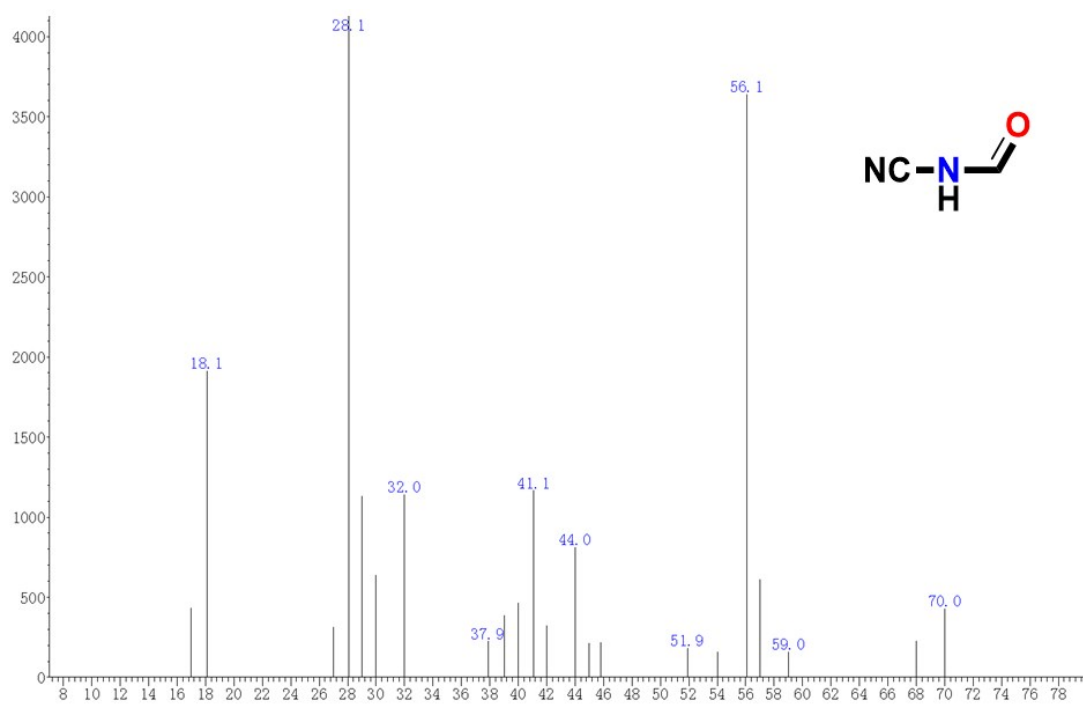

**Figure S28.** The mass spectrum of **3g**.

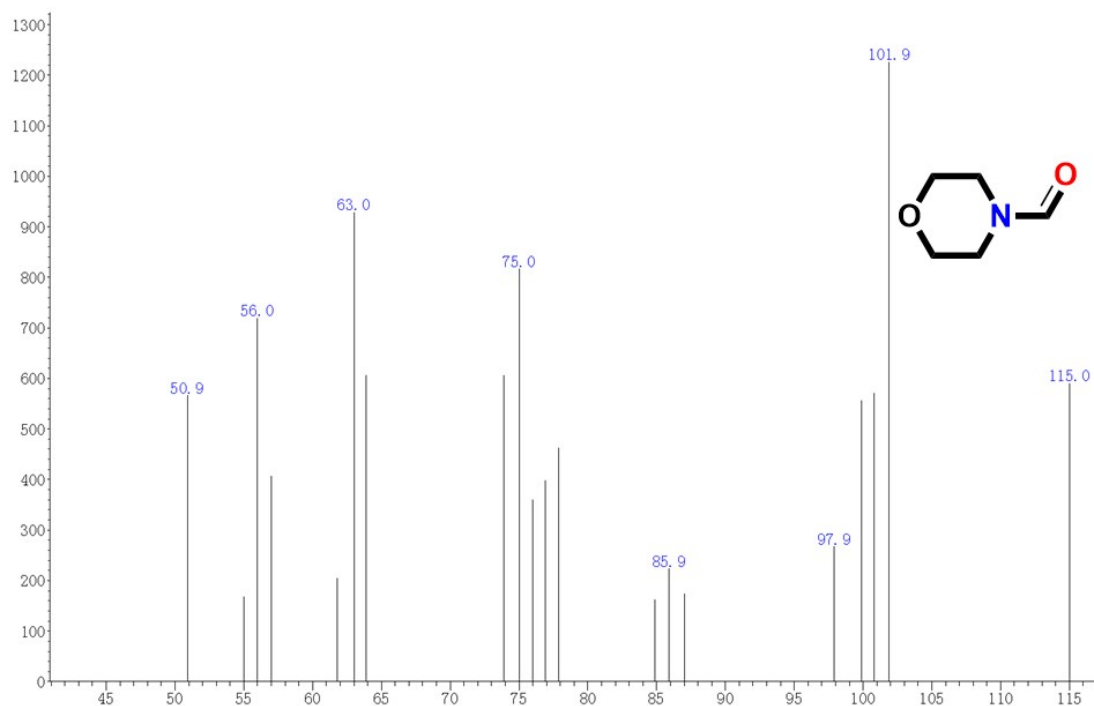

**Figure S29.** The mass spectrum of **3h**.

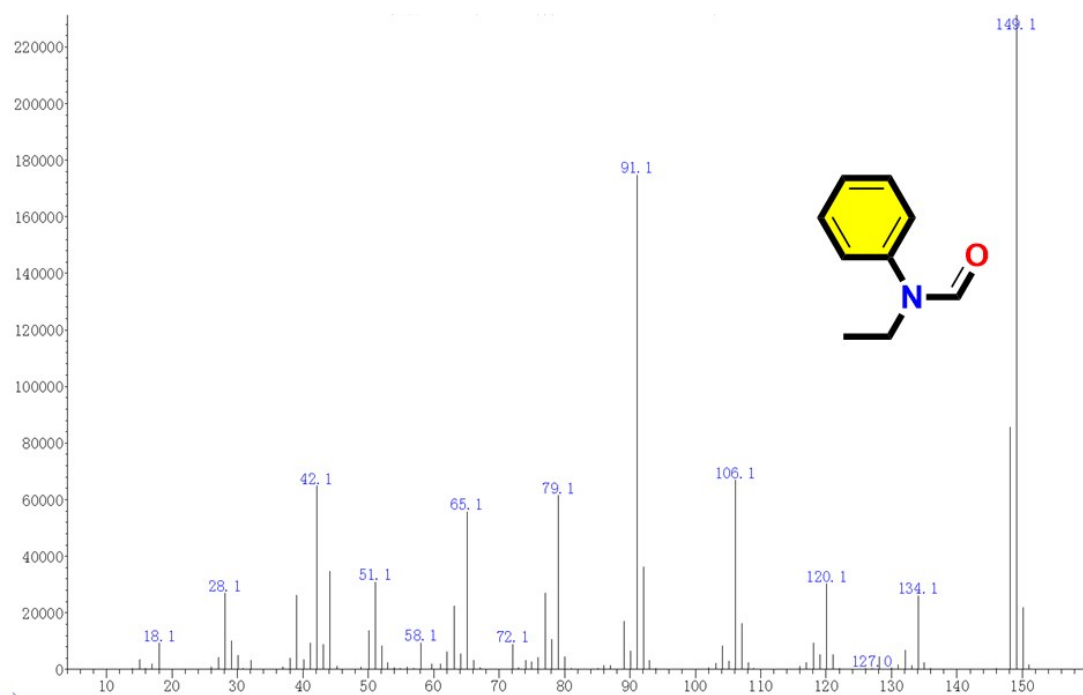

**Figure S30.** The mass spectrum of **3i**.

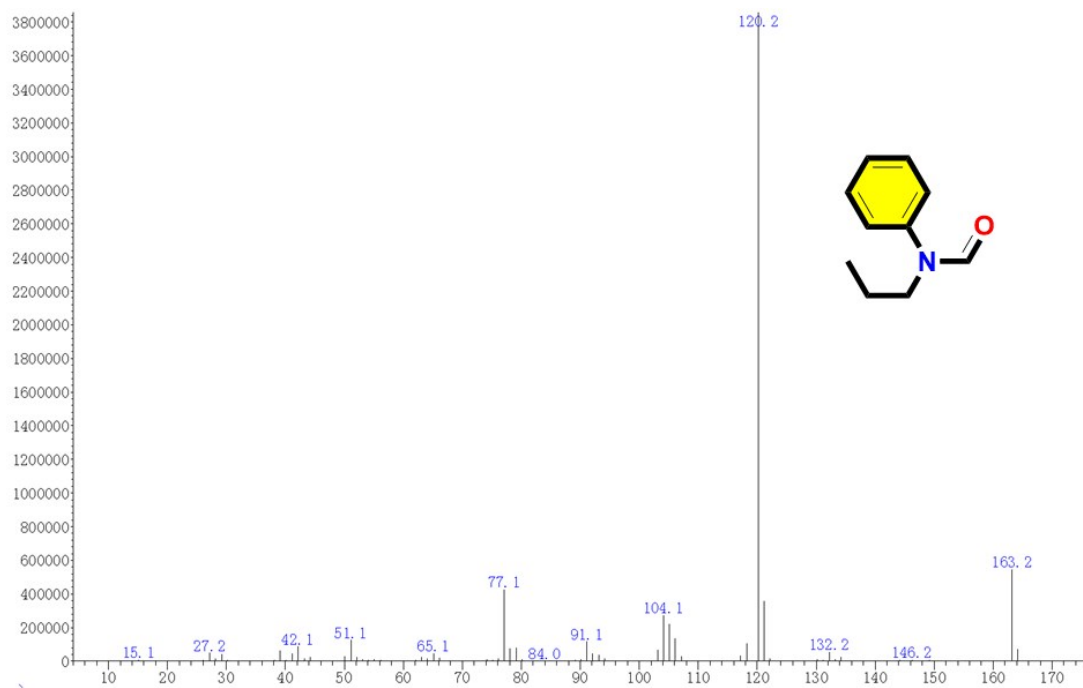

Figure S31. The mass spectrum of 3j.

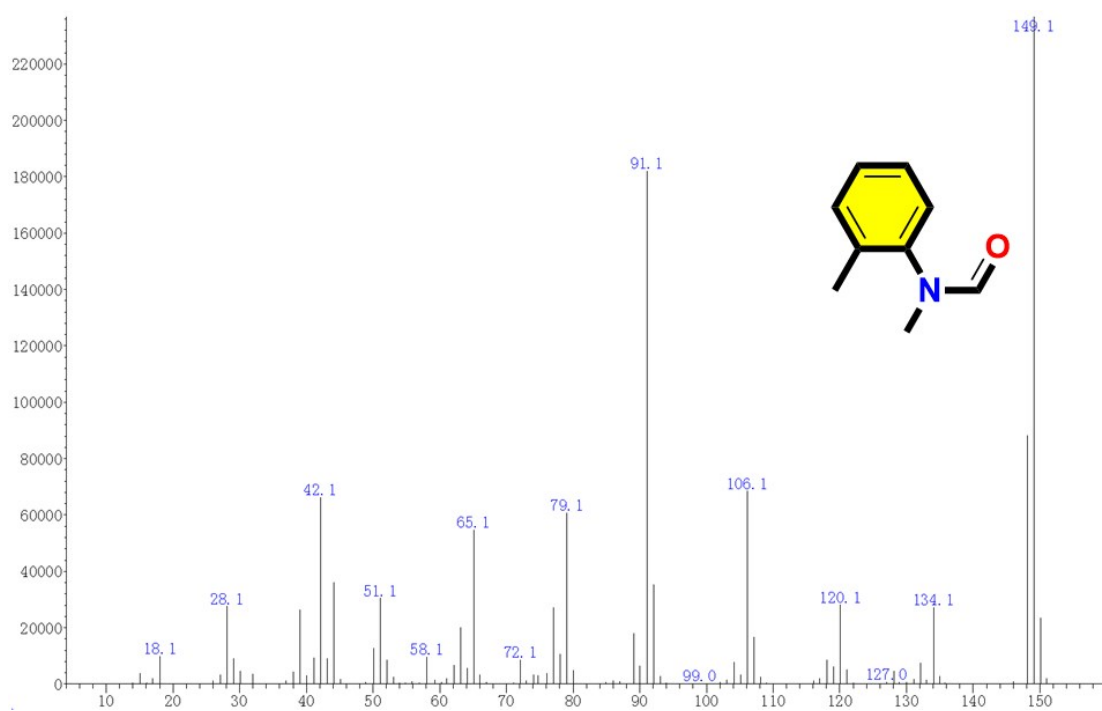

Figure S32. The mass spectrum of 3k.

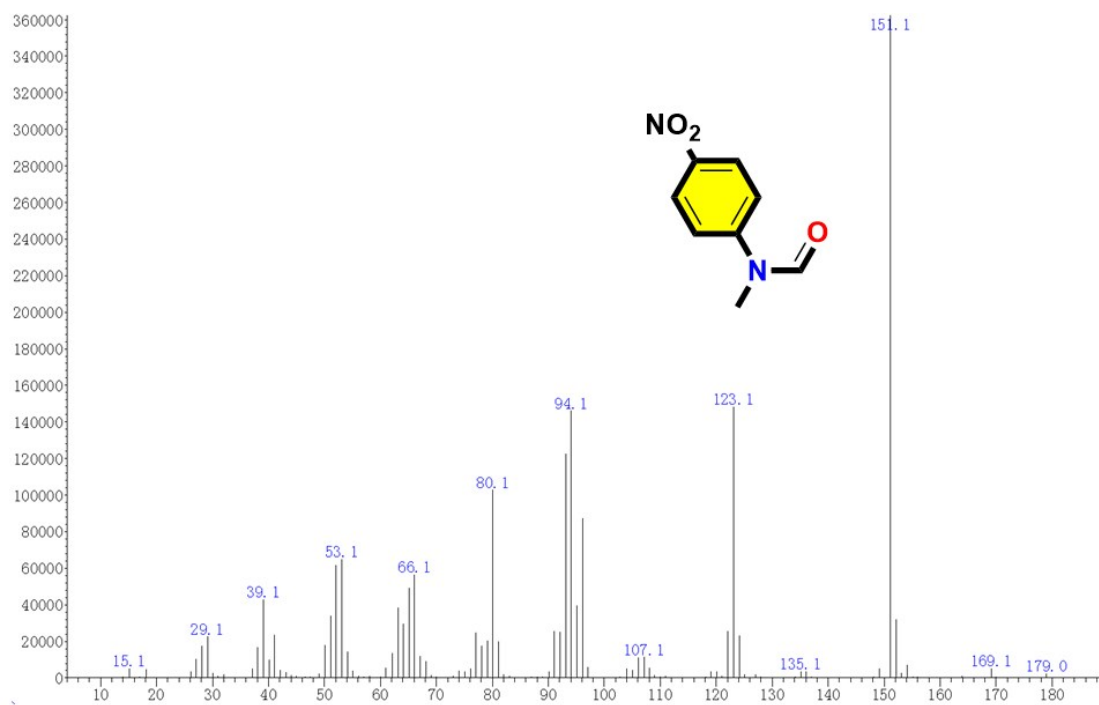

Figure S33. The mass spectrum of 3l.

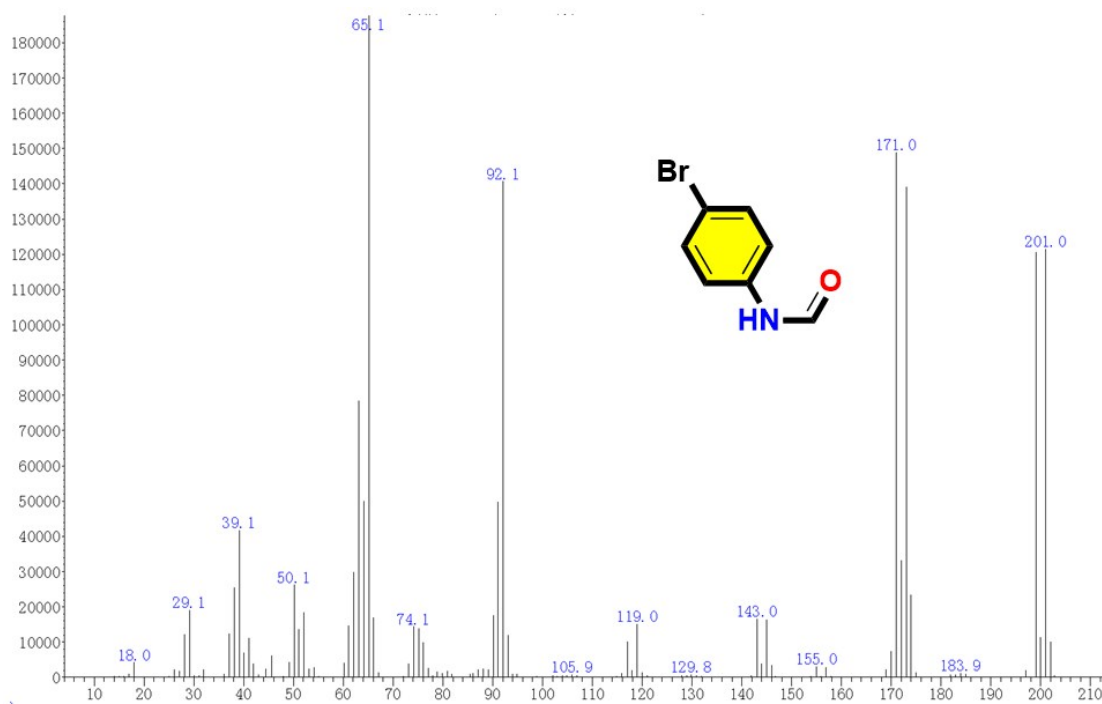

Figure S34. The mass spectrum of 3m.

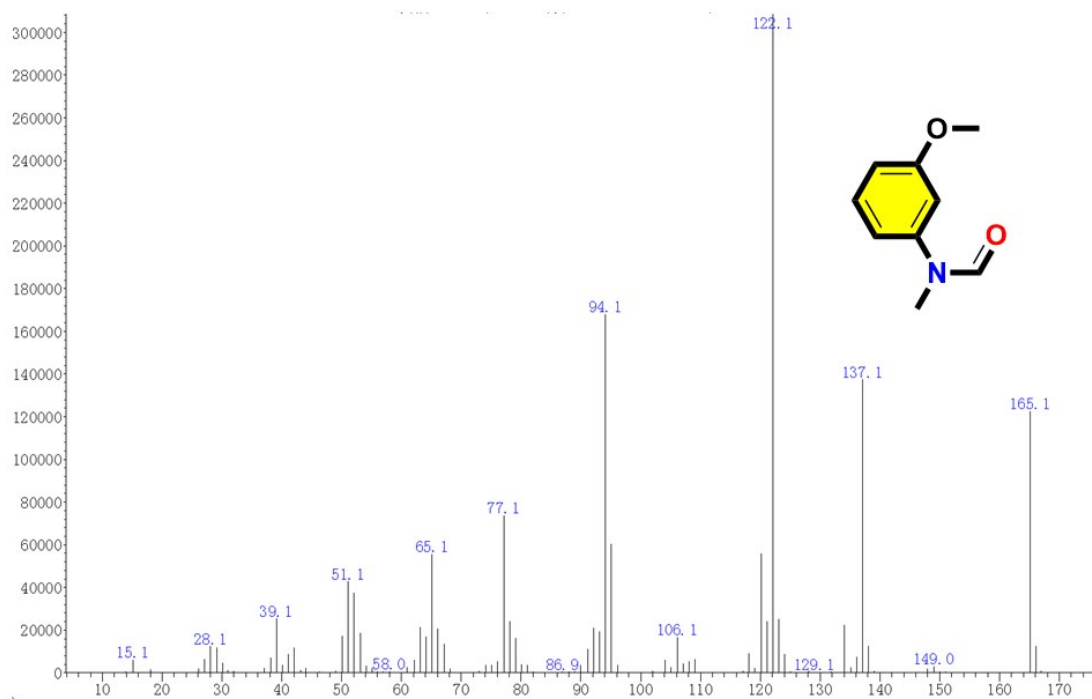

**Figure S35.** The mass spectrum of **3n**.

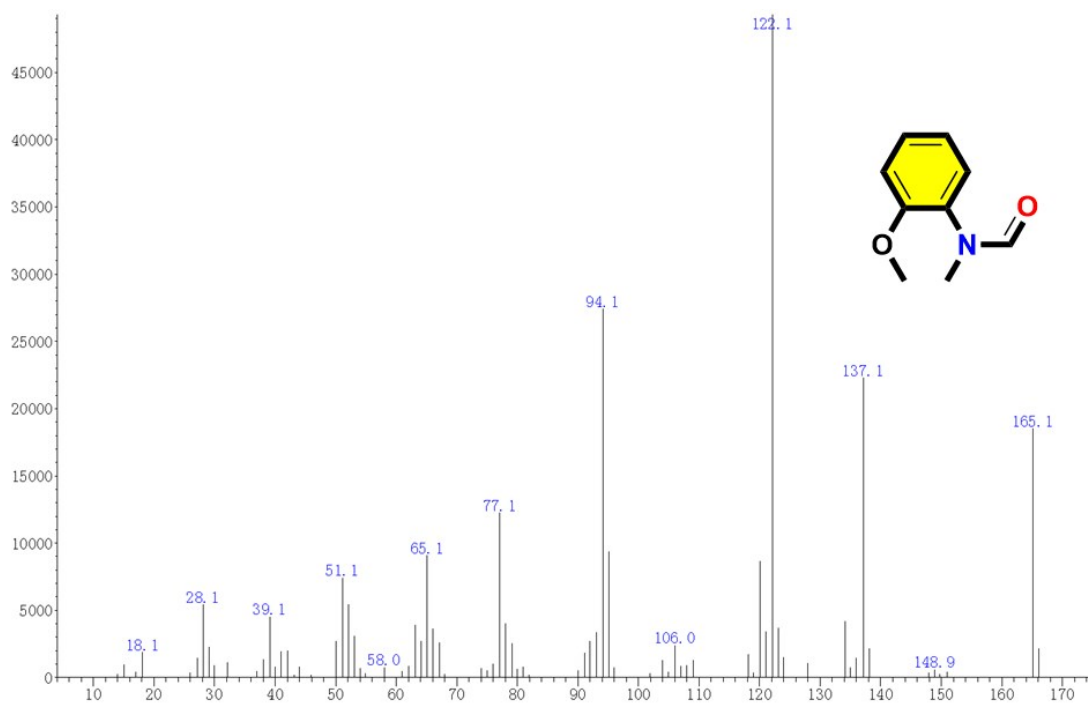

**Figure S36.** The mass spectrum of **3o**.

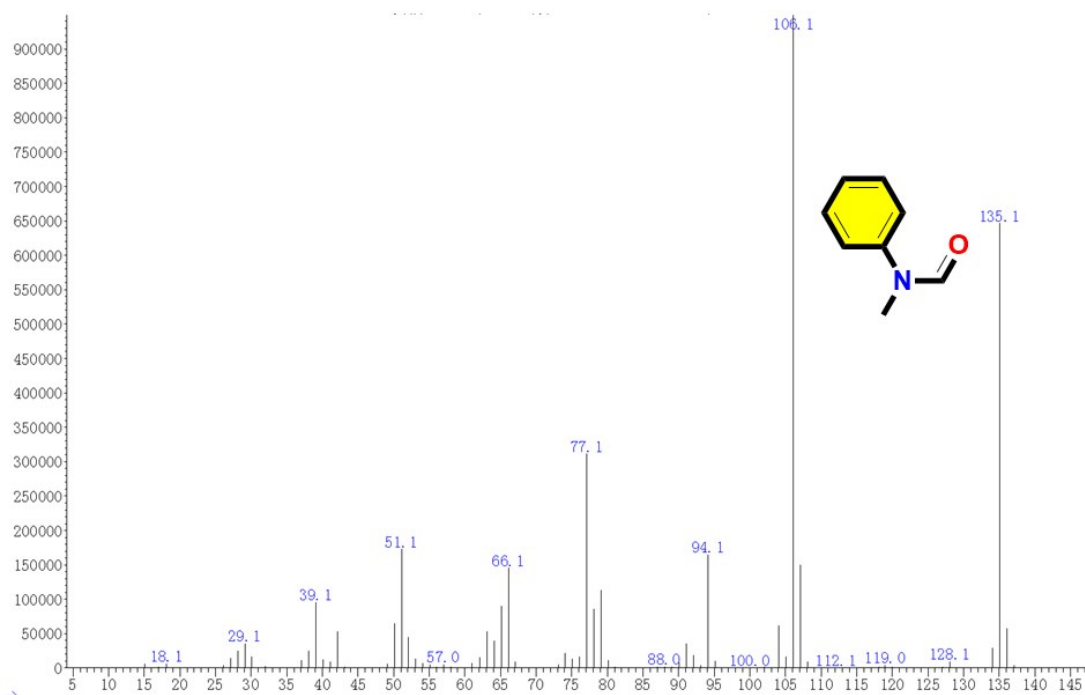

Figure S37. The mass spectrum of 3p.

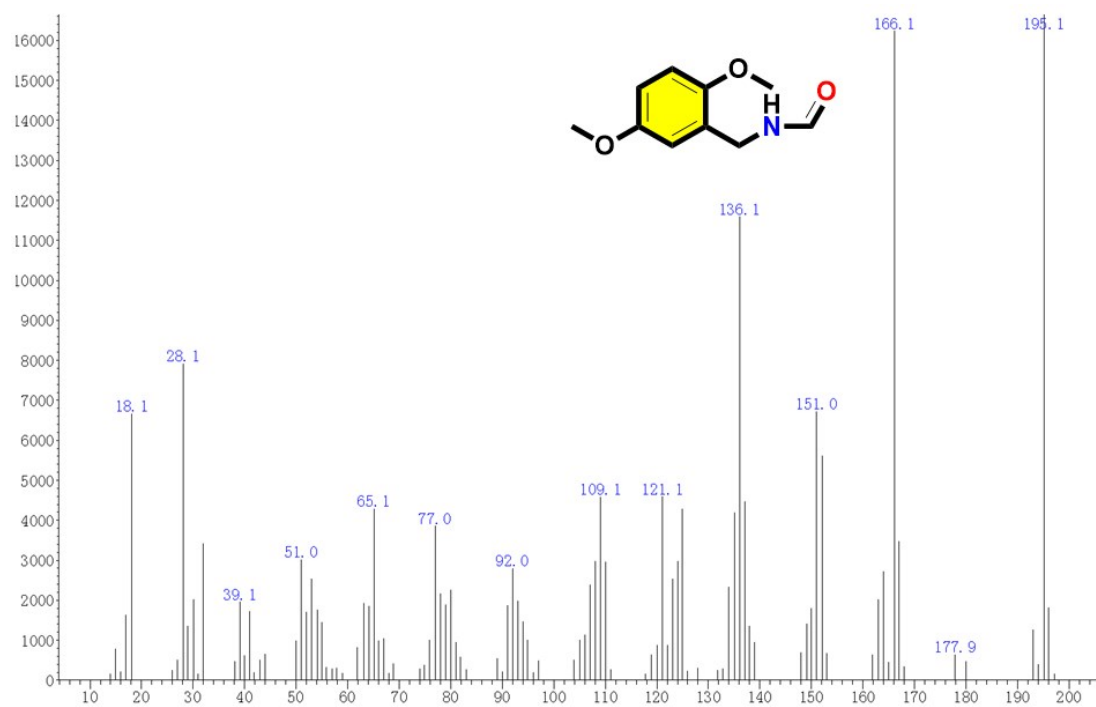

Figure S38. The mass spectrum of 3q.



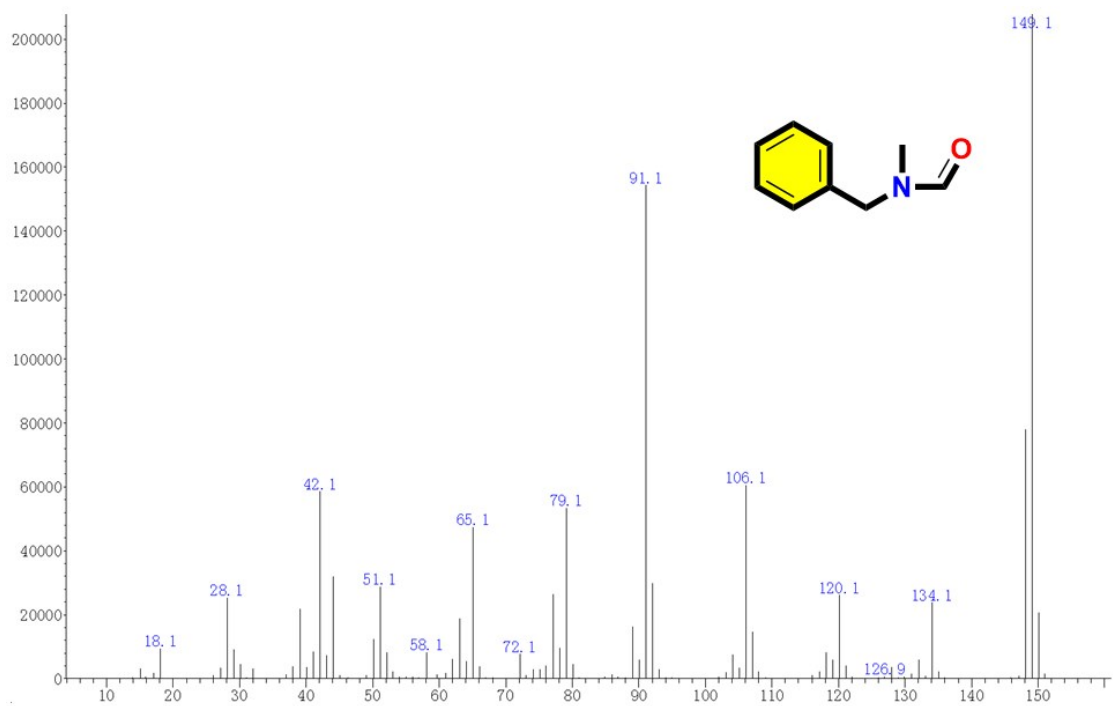

Figure S39. The mass spectrum of 3r.

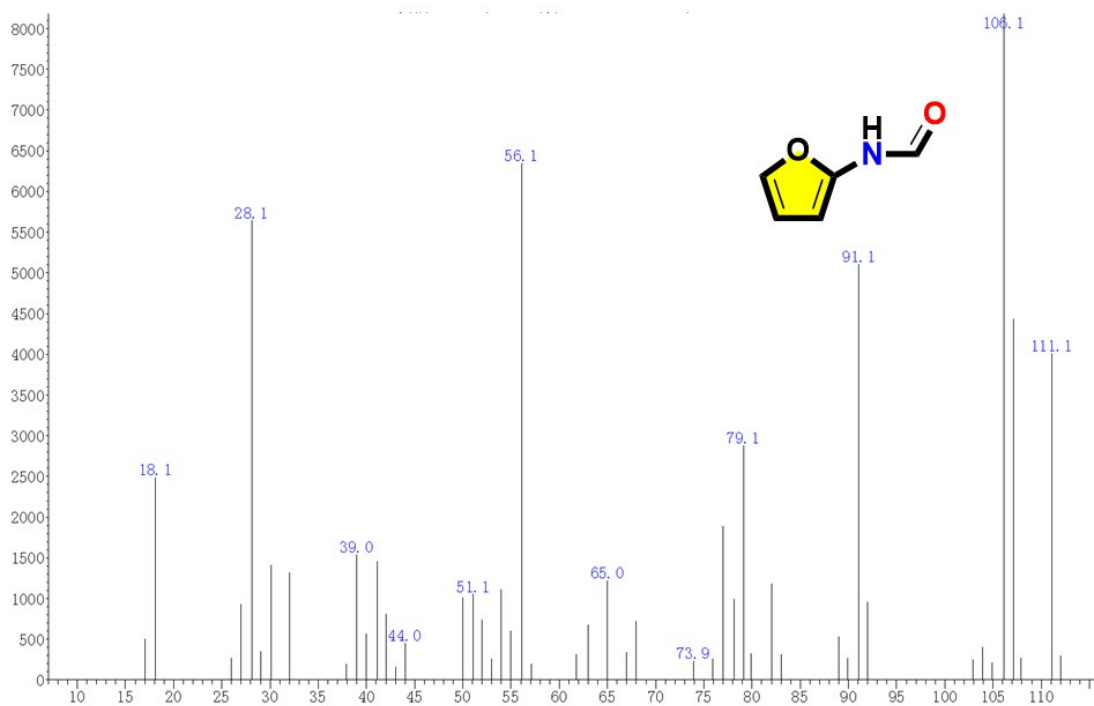

Figure S40. The mass spectrum of 3s.

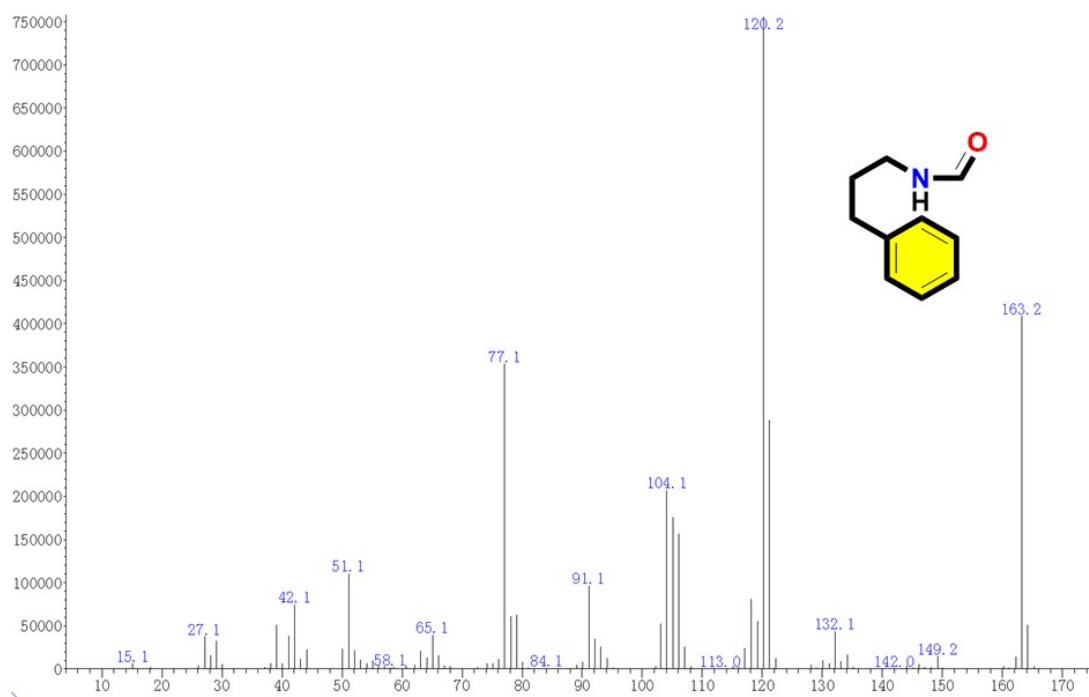

**Figure S41.** The mass spectrum of **3t**.

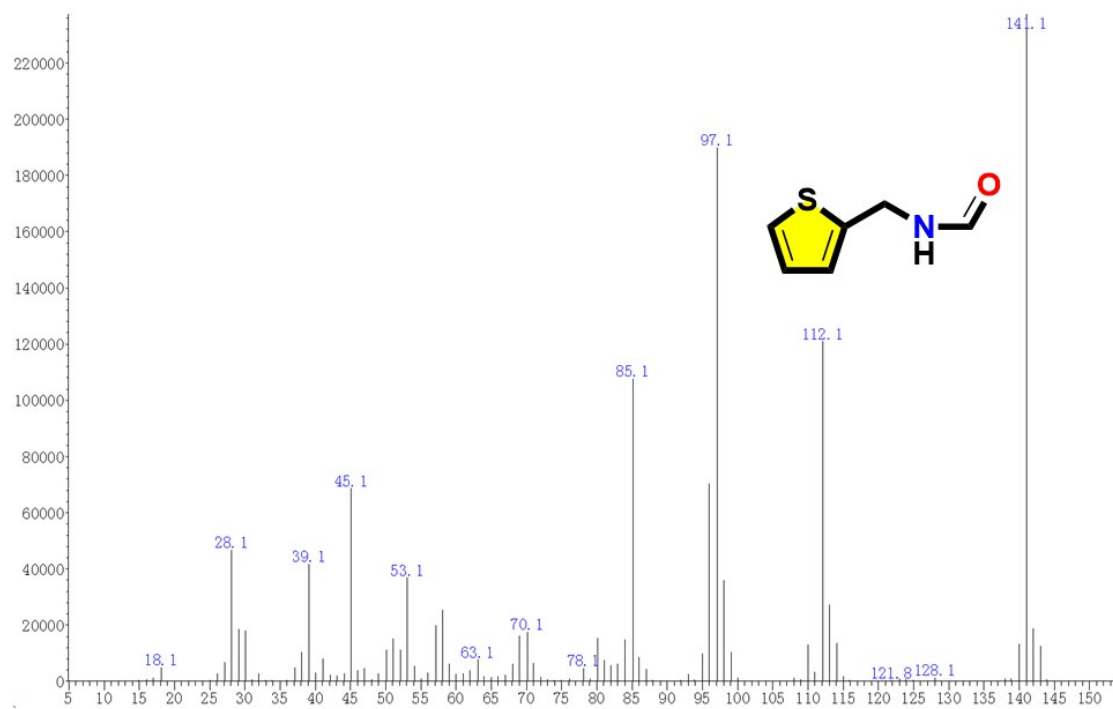

**Figure S42.** The mass spectrum of **3u**.

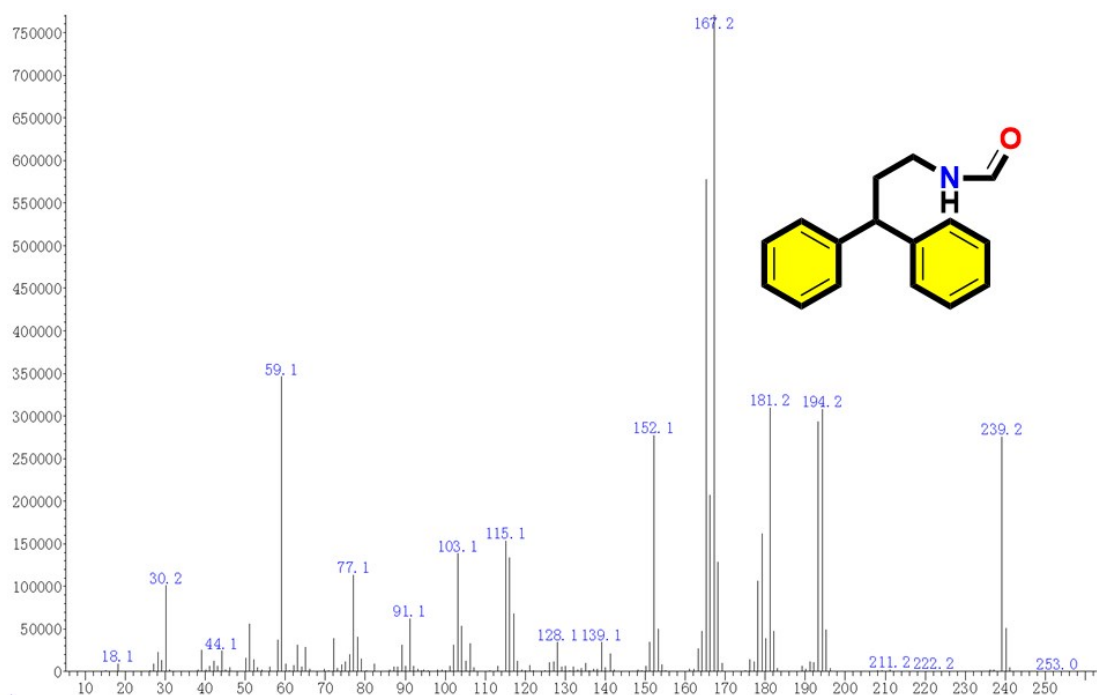

**Figure S43.** The mass spectrum of **3v**.

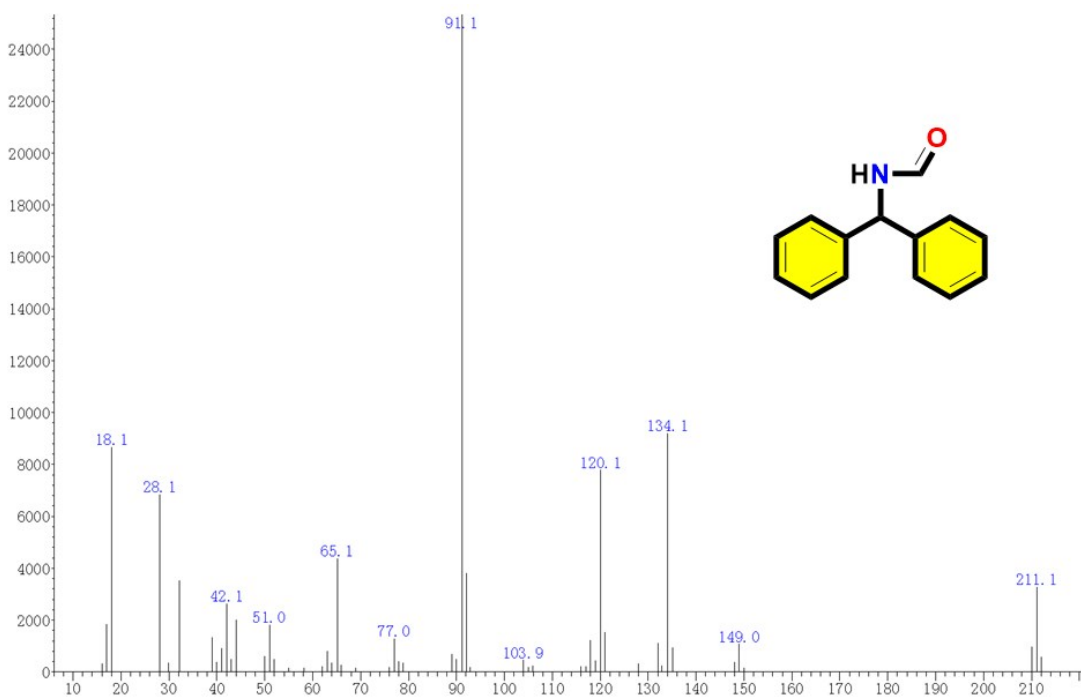

**Figure S44.** The mass spectrum of **3w**.

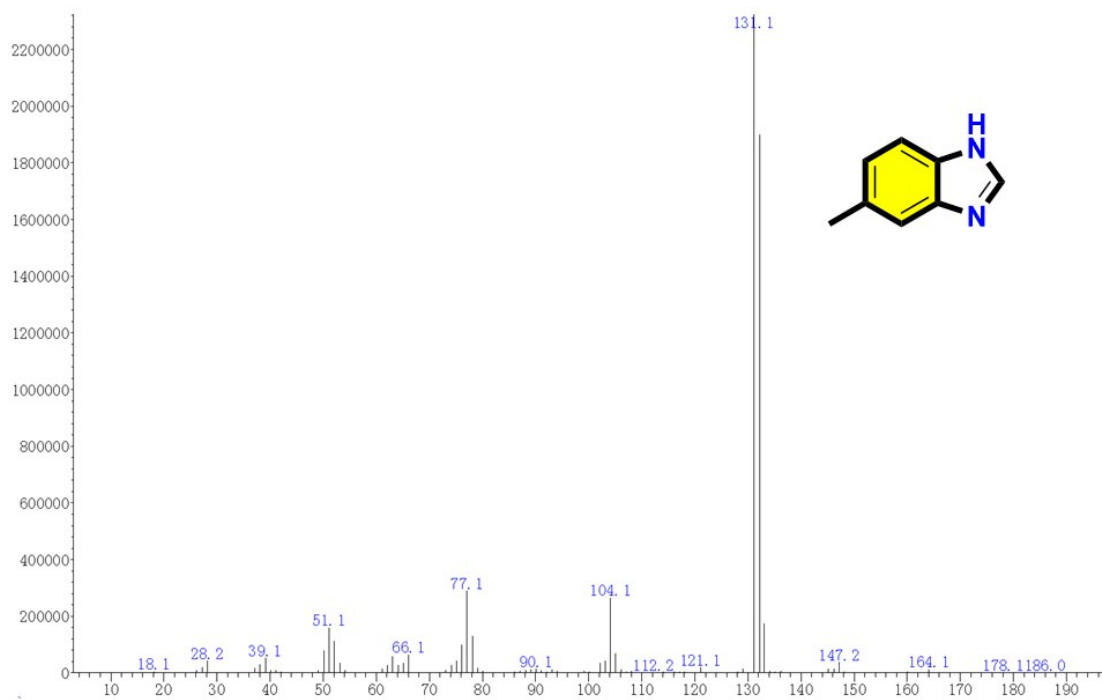

**Figure S45.** The mass spectrum of **4a**.

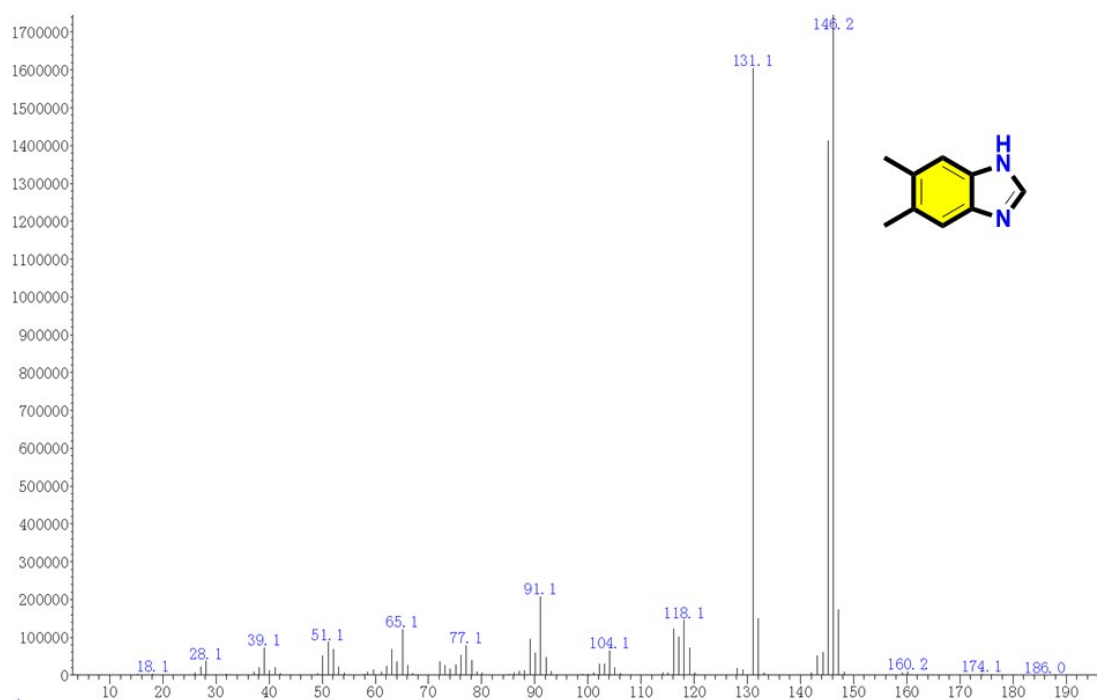

**Figure S46.** The mass spectrum of **4b**.

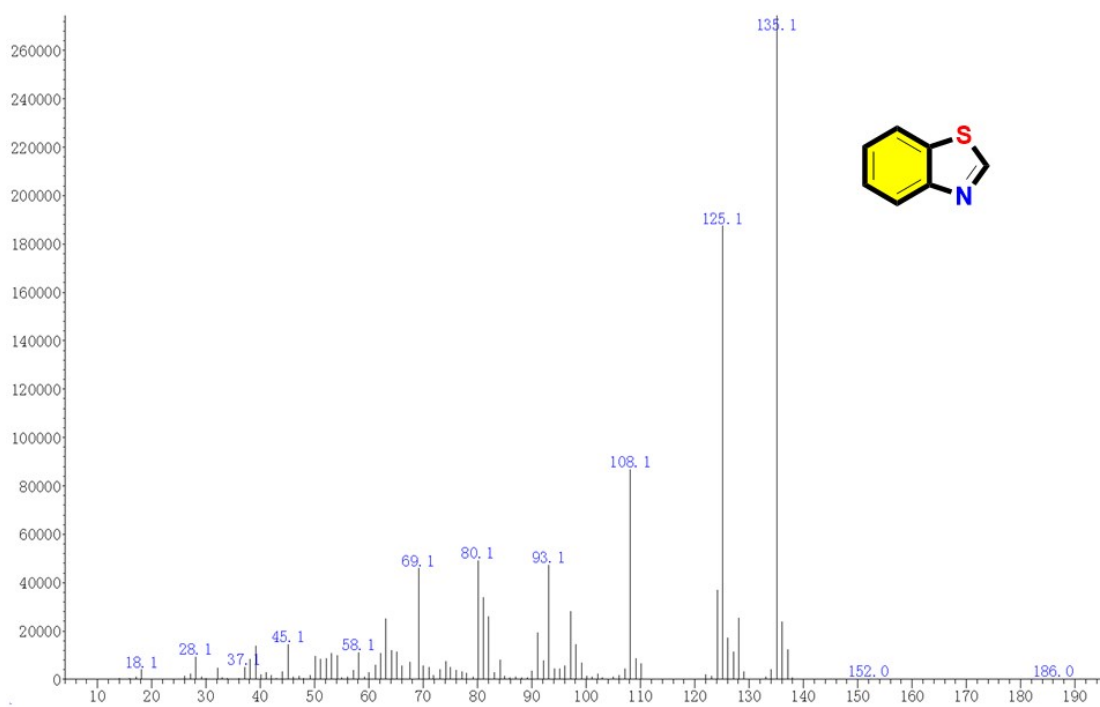

Figure S47. The mass spectrum of 4c.

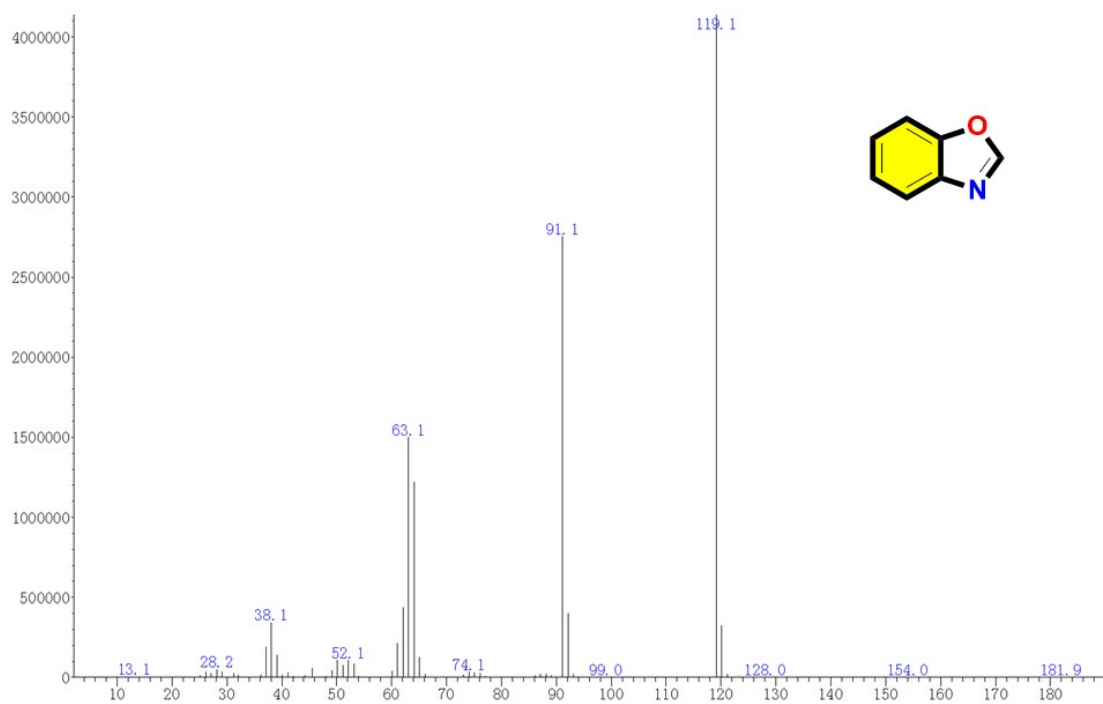

Figure S48. The mass spectrum of 4d.

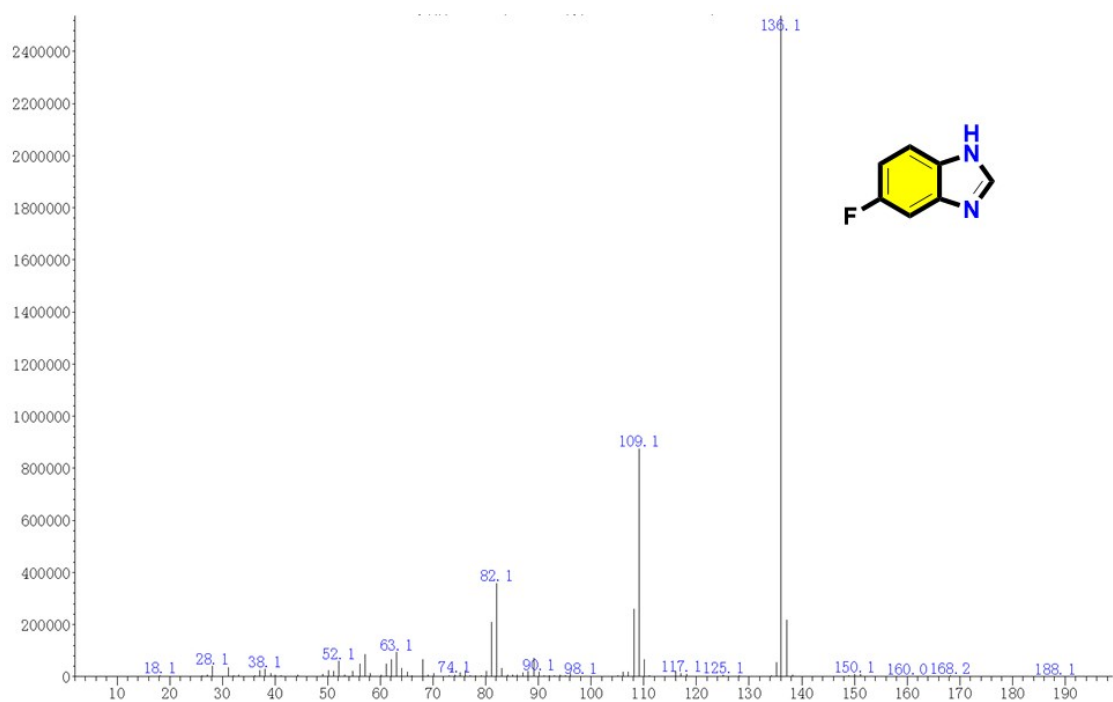

Figure S49. The mass spectrum of 4e.

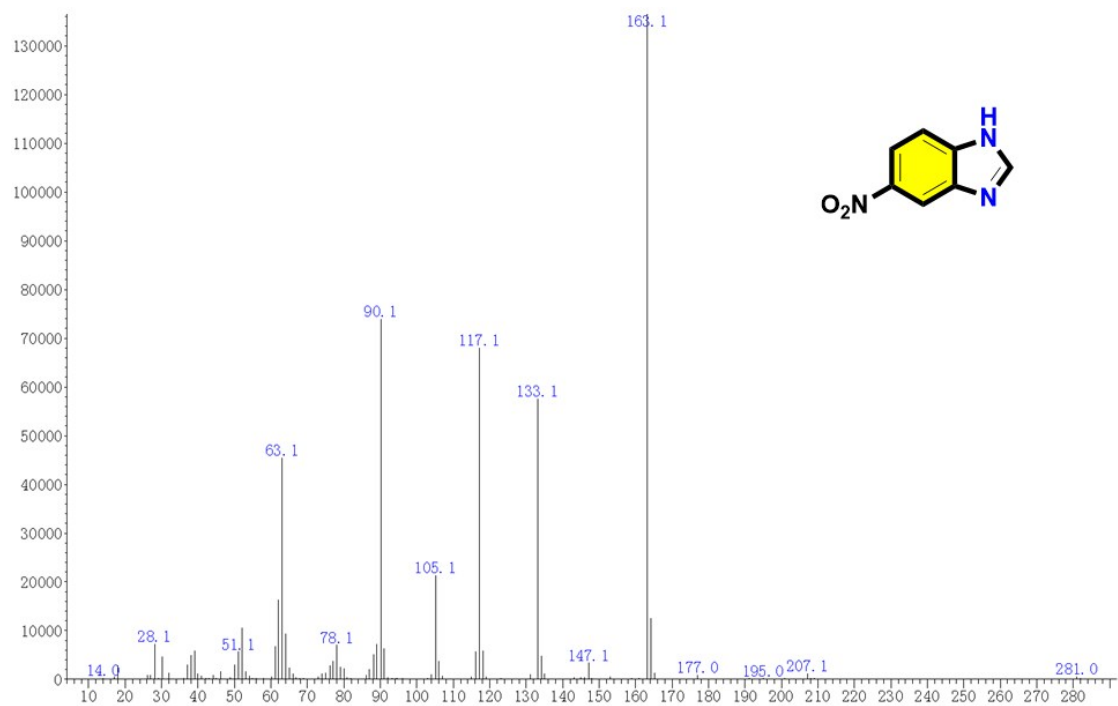

Figure S50. The mass spectrum of 4f.

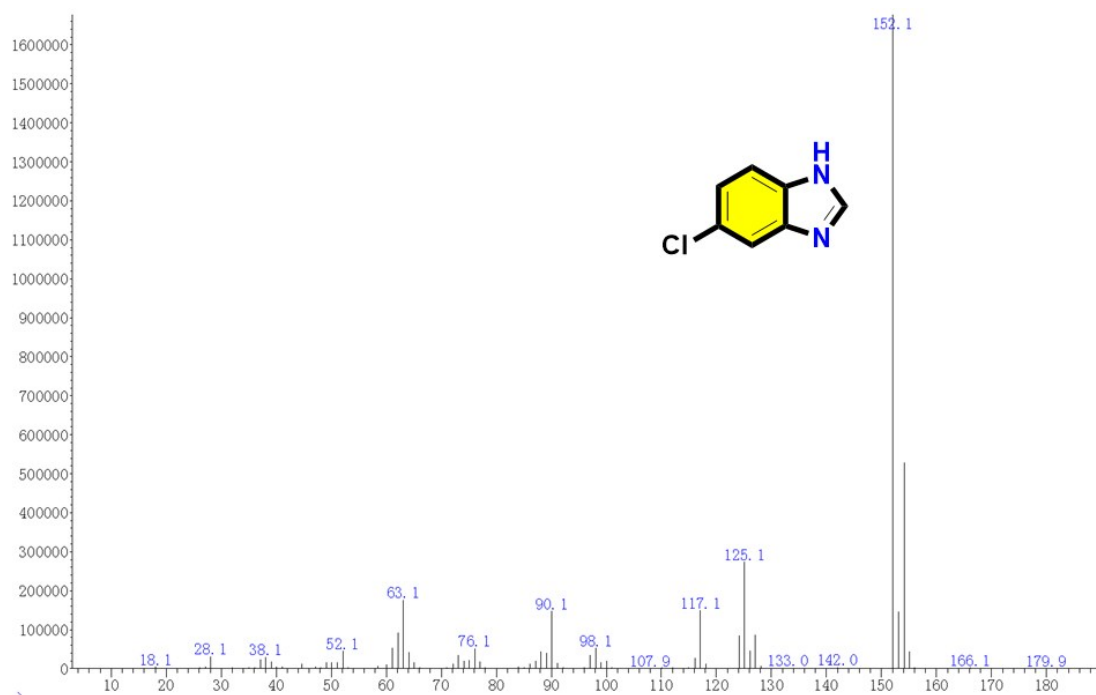

Figure S51. The mass spectrum of 4g.

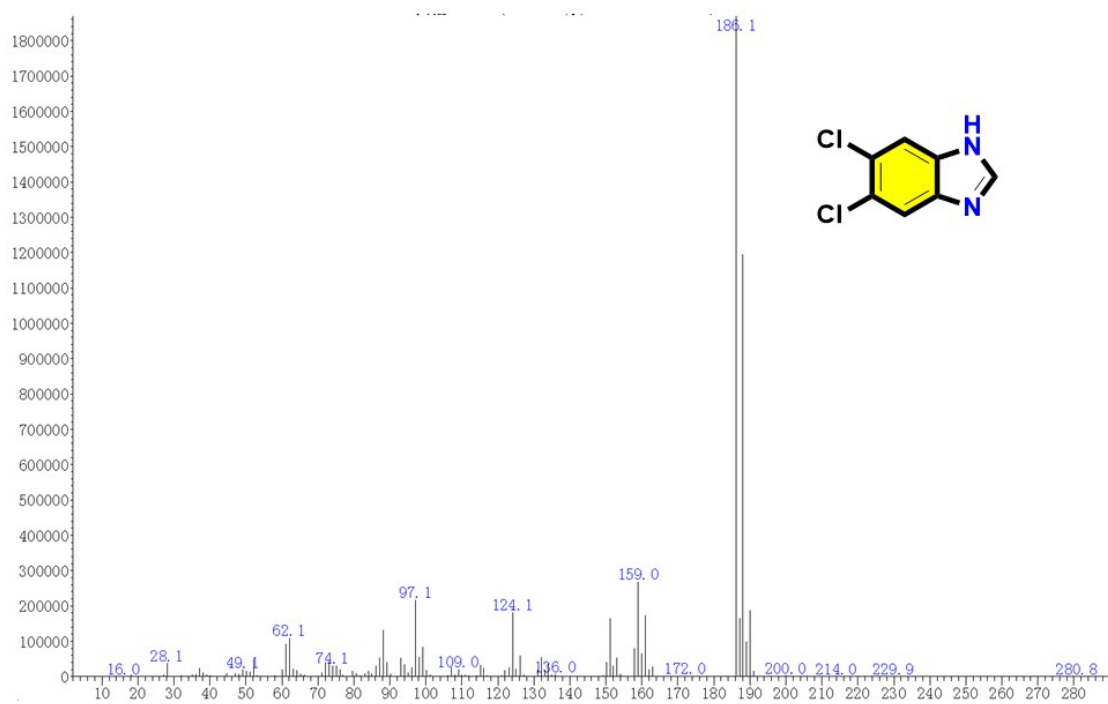

Figure S52. The mass spectrum of 4h.
